# Supplementary material for: COVID-19 drug discovery and treatment options
Source: Springer Nature journal article supplement (doi:10.1038/s41579-024-01036-y), 2024-04-15
Supplement: 41579_2024_1036_MOESM1_ESM.pdf [file 41579_2024_1036_MOESM1_ESM.pdf]

# COVID-19 drug discovery and treatment options

In the format provided by the authors and unedited

SUPPLEMENTARY TABLE 1 | **Representative virus-targeting therapeutic candidates for COVID-19.**

| Targets                  | Drug class                   | Examples                                                                                                                                                             | Antiviral mechanism                                                                                    | Pre-clinical antiviral data                                                                                                                                                                                                                                                                                |
|--------------------------|------------------------------|----------------------------------------------------------------------------------------------------------------------------------------------------------------------|--------------------------------------------------------------------------------------------------------|------------------------------------------------------------------------------------------------------------------------------------------------------------------------------------------------------------------------------------------------------------------------------------------------------------|
| <i>(A) Spike protein</i> |                              |                                                                                                                                                                      |                                                                                                        |                                                                                                                                                                                                                                                                                                            |
| <b>S1 subunit</b>        | mAb and nanobodies           | Amubarvimab/romlusevimab<br>Bamlanivimab-<br>etesevimab<br>Bebtelovimab<br>Casirivimab-<br>imdevimab<br>Regdanvimab<br>Sotrovimab<br>Tixagevimab/cilgavimab<br>10-40 | Targets the RBD and non-RBD regions of spike to inhibit virus entry into host cells.                   | <i>In vitro</i> : potently ↓ viral load and virus titers with EC <sub>50</sub> in nM range.<br><i>In vivo</i> : ↓ clinical signs, respiratory tract viral load, virus titers, and tissue pathology in various animal models.<br>Antiviral effects against different variants are variable <sup>1,2</sup> . |
|                          | Convalescent plasma          | Convalescent plasma                                                                                                                                                  | Plasma from recovered COVID-19 patients containing high-titer neutralizing anti-SARS-CoV-2 antibodies. | <i>In vivo</i> : passive immunization ↓ nasal and lung viral loads in Syrian hamsters and rhesus macaques <sup>3-5</sup> .                                                                                                                                                                                 |
|                          | Aptamers                     | nCoV-S1-Apt1 to Apt6<br>RBD-PB6                                                                                                                                      | Binds with S1 to inhibit spike-ACE2 interaction.                                                       | <i>In vitro</i> : EC <sub>50</sub> : 0.1-0.2μM (HEK293T-hACE2-TMPRSS2 cells) <sup>6,7</sup> .                                                                                                                                                                                                              |
|                          | Miniprotein inhibitors       | AHB1 & 2<br>LCB1 to 5                                                                                                                                                | Binds with RBD to block spike-ACE2 interaction.                                                        | <i>In vitro</i> : EC <sub>50</sub> : 24pM to 35nM VeroE6 cells) <sup>8</sup> .                                                                                                                                                                                                                             |
|                          | Naturally occurring alkaloid | Cepharanthine                                                                                                                                                        | Inhibits spike-ACE2 binding to prevent viral entry into host cells.                                    | <i>In vitro</i> : EC <sub>50</sub> : 0.98μmol/L (VeroE6 cells) <sup>9,10</sup> .                                                                                                                                                                                                                           |

|                       |                           |                                                                                                       |                                                                                                                     |                                                                                                                                                                                                                                                 |
|-----------------------|---------------------------|-------------------------------------------------------------------------------------------------------|---------------------------------------------------------------------------------------------------------------------|-------------------------------------------------------------------------------------------------------------------------------------------------------------------------------------------------------------------------------------------------|
| <b>S2 subunit</b>     | Indole derivate           | Umifenovir                                                                                            | Influenza drug that binds with SARS-CoV-2 S2 membrane fusion domain to ↓ viral fusion and entry.                    | <i>In vitro</i> : EC <sub>50</sub> : 4.11μM (VeroE6 cells) <sup>11,12</sup> .                                                                                                                                                                   |
|                       | HIV protease inhibitors   | Cobicistat                                                                                            | HIV protease inhibitor (darunavir-cobicistat) that inhibits SARS-CoV-2 spike-mediated fusion.                       | <i>In vitro</i> : EC <sub>50</sub> : <8.76μM (cobicistat in VeroE6, Calu-3, and T84 cells) and is synergistic with remdesivir.<br><i>In vivo</i> : ↓ body weight loss and lung viral load and virus titer in Syrian hamsters <sup>13</sup> .    |
|                       | Peptides                  | SARS <sub>HRC</sub> -PEG and related peptides<br>EK1 and related peptides<br>P9R and related peptides | Antiviral peptides that inhibit fusion of SARS-CoV-2 spike-mediated fusion.                                         | <i>In vitro</i> : potently ↓ viral load and virus titers with IC <sub>50</sub> in nM range.<br><i>In vivo</i> : ↓ respiratory tract viral load, virus titers, tissue pathology, and/or transmission in various animal models <sup>14-18</sup> . |
| <b>S1/S2 subunits</b> | DARPin                    | Ensovibep (MP0420)<br>MP0423                                                                          | Binds to multiple epitopes on the spike protein S1 and/or S2 subunits to inhibit virus entry into host cells.       | <i>In vitro</i> : EC <sub>50</sub> : <10ng/ml (VeroE6 cells).<br><i>In vivo</i> : ↑ survival and ↓ lung viral load, virus titers, and tissue pathology in Roborovski dwarf hamsters <sup>19</sup> .                                             |
|                       | Salicylanilide derivative | Niclosamide<br>DWRX2003                                                                               | Anthelmintic that inhibits SARS-CoV-2 replication by ↓ TMEM16-mediated syncytium formation and/or other mechanisms. | <i>In vitro</i> : EC <sub>50</sub> : 0.28-0.34μM (Vero and VeroE6 cells).<br><i>In vivo</i> : ↓ viral load and inflammation in lung tissues of ferrets <sup>20-22</sup> .                                                                       |
|                       | Lectins                   | H84T-banana lectin (BanLec)                                                                           | Binds to high-mannose glycans on spike protein to prevent virus entry into host cells.                              | <i>In vitro</i> : EC <sub>50</sub> : <0.02μM (VeroE6 cells).<br><i>In vivo</i> : ↓ respiratory tract viral load, virus titer, and tissue pathology in hamsters <sup>23</sup> .                                                                  |
|                       |                           | FRIL                                                                                                  | Binds to complex-type glycans on spike protein.                                                                     | <i>In vitro</i> : EC <sub>50</sub> : <0.01μM (VeroE6 cells) <sup>24</sup> .                                                                                                                                                                     |
|                       |                           | Griffithsin                                                                                           | Binds to high mannose glycans on spike protein to prevent virus entry into host cells.                              | <i>In vitro</i> : EC <sub>50</sub> : <0.05μM (VeroE6 cells).<br><i>In vivo</i> : ↓ viral load and virus titer in mice <sup>25,26</sup> .                                                                                                        |

---

**(B) Viral enzymes**

---

|                         |                                                         |                                                                                |                                                                                                                                                                              |                                                                                                                                                                                                                                                                                                                                                                                     |
|-------------------------|---------------------------------------------------------|--------------------------------------------------------------------------------|------------------------------------------------------------------------------------------------------------------------------------------------------------------------------|-------------------------------------------------------------------------------------------------------------------------------------------------------------------------------------------------------------------------------------------------------------------------------------------------------------------------------------------------------------------------------------|
| <b>PL<sup>pro</sup></b> | CoV PL <sup>pro</sup> inhibitors                        | F0213                                                                          | Potential “pan-CoV” PL <sup>pro</sup> inhibitor that competitively inhibits the PL <sup>pro</sup> of SARS-CoV-2 and other CoVs via binding with the 157K amino acid residue. | <i>In vitro</i> : EC <sub>50</sub> : 7.4μmol/L against SARS-CoV-2 PL <sup>pro</sup> .<br><i>In vivo</i> : oral or IP F0213 ↓ lung viral load, virus titers, viral antigen expression, and tissue pathology in hamsters <sup>27</sup> .                                                                                                                                              |
|                         |                                                         | GRL-0617                                                                       | SARS-CoV inhibitor that also inhibits SARS-CoV-2 PL <sup>pro</sup> .                                                                                                         | <i>In vitro</i> : EC <sub>50</sub> : 3.18μmol/L (VeroE6 cells) <sup>28,29</sup> .                                                                                                                                                                                                                                                                                                   |
|                         | Other repositioned drugs                                | rac3j, rac3k, and rac5c                                                        | SARS-CoV inhibitors that also inhibit SARS-CoV-2 PL <sup>pro</sup> .                                                                                                         | <i>In vitro</i> : ↓ SARS-CoV-2 replication (Vero cells) <sup>30</sup> .                                                                                                                                                                                                                                                                                                             |
|                         |                                                         | 6-thioguanine                                                                  | Guanine analog used in the treatment of leukemia that inhibits SARS-CoV-2 PL <sup>pro</sup> .                                                                                | <i>In vitro</i> : EC <sub>50</sub> : 2.13μM (VeroE6 cells) <sup>31</sup> .                                                                                                                                                                                                                                                                                                          |
|                         |                                                         | Cryptotanshinone                                                               | Natural quinone compound and STAT-3 inhibitor that inhibits SARS-CoV-2 PL <sup>pro</sup> .                                                                                   | <i>In vitro</i> : EC <sub>50</sub> : 0.70μmol/L (VeroE6 cells) <sup>28</sup> .                                                                                                                                                                                                                                                                                                      |
|                         |                                                         | Sepantronium bromide (YM155)                                                   | Survivin inhibitor that inhibits SARS-CoV-2 PL <sup>pro</sup> .                                                                                                              | <i>In vitro</i> : EC <sub>50</sub> : 0.17μmol/L (VeroE6 cells) <sup>28</sup> .                                                                                                                                                                                                                                                                                                      |
| Tanshinone I            | Tanshinone that inhibits SARS-CoV-2 PL <sup>pro</sup> . | <i>In vitro</i> : EC <sub>50</sub> : 2.26μmol/L (VeroE6 cells) <sup>28</sup> . |                                                                                                                                                                              |                                                                                                                                                                                                                                                                                                                                                                                     |
| <b>M<sup>pro</sup></b>  | CoV M <sup>pro</sup> inhibitors                         | Nirmatrelir-ritonavir (PF-07321332)                                            | Inhibits M <sup>pro</sup> of SARS-CoV-2 and other CoVs. Lufotrelvir (PF-07304814) is a related intravenous SARS-CoV-2 M <sup>pro</sup> inhibitor.                            | <i>In vitro</i> : “pan-coronaviral” activity against human-pathogenic CoVs in M <sup>pro</sup> enzymatic inhibition and CPE inhibition assays (EC <sub>50</sub> : <0.08μM in VeroE6s, A549-hACE2, and human bronchial epithelial cells).<br><i>In vivo</i> : ↓ weight loss, virus titer, and tissue pathology in BALB/c mice infected with mouse-adapted SARS-CoV-2 <sup>32</sup> . |
|                         |                                                         | 13b                                                                            | Inhibits M <sup>pro</sup> of SARS-CoV-2 and other                                                                                                                            | <i>In vitro</i> : EC <sub>50</sub> : <5.0μM (Calu-3 cells) <sup>33</sup> .                                                                                                                                                                                                                                                                                                          |

|                          | CoVs.                                                                                  |                                                                                                                                                                                                                                                                 |
|--------------------------|----------------------------------------------------------------------------------------|-----------------------------------------------------------------------------------------------------------------------------------------------------------------------------------------------------------------------------------------------------------------|
| ALG-097431               | Inhibits M <sup>pro</sup> of SARS-CoV-2 and other CoVs.                                | <i>In vitro</i> : inhibits SARS-CoV-2 (EC <sub>50</sub> : 0.2μM), HCoV-OC43, and HCoV-229E in A549-hACE2, HeLa, and Huh-7 cells, respectively.<br><i>In vivo</i> : ↓ lung viral load and virus titer in Syrian hamsters <sup>34</sup> .                         |
| ASC-11                   | Inhibits SARS-CoV-2 M <sup>pro</sup> .                                                 | <i>In vitro</i> : EC <sub>90</sub> : 0.005μM (VeroE6 cells) <sup>35</sup> .                                                                                                                                                                                     |
| EDP-235                  | Inhibits SARS-CoV-2 M <sup>pro</sup> .                                                 | <i>In vitro</i> : EC <sub>90</sub> : 0.033μM (VeroE6 cells) <sup>35,36</sup> .                                                                                                                                                                                  |
| Ensitrelvir (S-217622)   | Inhibits SARS-CoV-2 M <sup>pro</sup> .                                                 | <i>In vitro</i> : “pan-coronaviral” activity against SARS-CoV-2 (EC <sub>50</sub> : <0.5μM in VeroE6-TMPRSS2 cells) and other human-pathogenic CoVs <sup>37</sup> .<br><i>In vivo</i> : ↓ respiratory tract virus titer in mice and hamsters <sup>37-39</sup> . |
| GC373<br>GC376           | Feline CoV M <sup>pro</sup> inhibitors that also inhibit SARS-CoV-2 M <sup>pro</sup> . | <i>In vitro</i> : EC <sub>50</sub> : 1.50μM (GC373) and 0.90 (GC376) (VeroE6 cells) <sup>40</sup> .                                                                                                                                                             |
| GDI-4405                 | Inhibits SARS-CoV-2 M <sup>pro</sup> .                                                 | <i>In vitro</i> : inhibits SARS-CoV-2 in multiple assays including in primary human-derived airway epithelial cells <sup>41</sup> .                                                                                                                             |
| 11a & 11b<br>FB2001      | Inhibits SARS-CoV-2 M <sup>pro</sup> .                                                 | <i>In vitro</i> : EC <sub>50</sub> : 0.53μM (VeroE6 cells) <sup>42</sup> .                                                                                                                                                                                      |
| Leritrelvir<br>(RAY1216) | Inhibits SARS-CoV-2 M <sup>pro</sup> .                                                 | <i>In vitro</i> : EC <sub>50</sub> : <200nM (VeroE6 cells) <sup>43</sup> .<br><i>In vivo</i> : ↑survival, ↓ lung viral titer, and tissue pathology in K18-hACE2 mice <sup>43</sup> .                                                                            |
| MI-09<br>MI-30           | Novel bicycloproline-containing SARS-CoV-2 M <sup>pro</sup> inhibitors.                | <i>In vitro</i> : EC <sub>50</sub> : <0.9μM (VeroE6 cells).<br><i>In vivo</i> : ↓ lung viral loads and tissue pathology in hACE2 mice <sup>44</sup> .                                                                                                           |
| PBI-0451                 | Inhibits SARS-CoV-2 M <sup>pro</sup> .                                                 | <i>In vitro</i> : EC <sub>90</sub> : 32nM (VeroE6 cells) <sup>45</sup> .                                                                                                                                                                                        |

|             |                          |                                                       |                                                                                                |                                                                                                                                                                                                                         |
|-------------|--------------------------|-------------------------------------------------------|------------------------------------------------------------------------------------------------|-------------------------------------------------------------------------------------------------------------------------------------------------------------------------------------------------------------------------|
|             |                          | PF-00835231                                           | SARS-CoV M <sup>pro</sup> inhibitor that also inhibits SARS-CoV-2 M <sup>pro</sup> .           | <i>In vitro</i> : EC <sub>50</sub> : 0.221μM (A549-ACE2 cells) <sup>46</sup> .                                                                                                                                          |
|             |                          | N3                                                    | Michael acceptor inhibitor that inhibits M <sup>pro</sup> of SARS-CoV-2 and other CoVs.        | <i>In vitro</i> : “pan-coronaviral” activity against SARS-CoV-2 (EC <sub>50</sub> : 16.77μM in VeroE6 cells) and other human-pathogenic CoVs <sup>47</sup> .                                                            |
|             |                          | Simnotrelvir-ritonavir (SIM0417)                      | Inhibits SARS-CoV-2 M <sup>pro</sup> .                                                         | <i>In vitro</i> : EC <sub>50</sub> : 43nM (VeroE6 cells) <sup>48</sup> .<br><i>In vivo</i> : ↓ body weight loss, lung virus titer, and tissue pathology in K18-hACE2 mice <sup>48</sup> .                               |
|             |                          | Y180                                                  | Inhibits SARS-CoV-2 M <sup>pro</sup> .                                                         | <i>In vitro</i> : EC <sub>50</sub> : <0.04μM (VeroE6-TMPRSS2 cells).<br><i>In vivo</i> : ↑ survival and ↓ body weight loss, lung viral load, virus titer, and tissue pathology in K18-hACE2 mice <sup>49</sup> .        |
|             | HCV protease inhibitors  | Boceprevir<br>Ciluprevir<br>Narlaprevir<br>Telaprevir | HCV protease inhibitors that may also inhibit SARS-CoV-2 M <sup>pro</sup> .                    | <i>In vitro</i> : EC <sub>50</sub> : 11.552μM (telaprevir in VeroE6 cells) <sup>50,51</sup> .                                                                                                                           |
|             | HIV protease inhibitors  | Atazanavir                                            | HIV protease inhibitor (atazanavir-ritonavir) that also inhibits SARS-CoV-2 M <sup>pro</sup> . | <i>In vitro</i> : EC <sub>50</sub> : <0.5μM (atazanavir in Calu-3 cells) <sup>52</sup> .<br><i>In vivo</i> : ↑ survival and ↓ body weight loss, lung viral load, and tissue pathology in K18-hACE2 mice <sup>53</sup> . |
|             |                          | Lopinavir                                             | HIV protease inhibitor (lopinavir-ritonavir) that also inhibits SARS-CoV-2 M <sup>pro</sup> .  | <i>In vitro</i> : EC <sub>50</sub> : 11.6μM (lopinavir in VeroE6 cells) <sup>54</sup> .<br><i>In vivo</i> : ↓ clinical scores but no significant ↓ nasal wash viral load in ferrets <sup>55</sup> .                     |
|             | Other repositioned drugs | Emodin                                                | An anthraquinone that inhibits SARS-CoV-2 M <sup>pro</sup> .                                   | <i>In vitro</i> : EC <sub>50</sub> : <32.00μM (Vero and Calu-3 cells) <sup>56</sup> .                                                                                                                                   |
| <b>RdRp</b> | Remdesivir and related   | Remdesivir (GS-5734) and its active                   | Broad-spectrum nucleoside analog viral RdRp inhibitor.                                         | <i>In vitro</i> : EC <sub>50</sub> : 0.77μM (VeroE6 cells) <sup>57</sup> .<br><i>In vivo</i> : ↓ clinical signs, lung infiltrates, viral                                                                                |

|                                      |                                     |                                                                                                                   |                                                                                                                                                                                                                                                                                       |
|--------------------------------------|-------------------------------------|-------------------------------------------------------------------------------------------------------------------|---------------------------------------------------------------------------------------------------------------------------------------------------------------------------------------------------------------------------------------------------------------------------------------|
| compounds                            | metabolite GS-441524                |                                                                                                                   | loads, virus titers, and tissue pathology in rhesus macaques <sup>58</sup> .                                                                                                                                                                                                          |
|                                      | ATV006                              | Oral derivate of GS-441524 (parent nucleoside of remdesivir) viral RdRp inhibitor.                                | <i>In vitro</i> : EC <sub>50</sub> : <2.00μM (VeroE6 and Huh7cells).<br><i>In vivo</i> : oral ATV006 ↓ lung viral loads, virus titer, and tissue pathology in mice <sup>59</sup> .                                                                                                    |
|                                      | GS-621763                           | Oral prodrug of GS-441524 (parent nucleoside of remdesivir) viral RdRp inhibitor.                                 | <i>In vitro</i> : EC <sub>50</sub> : 0.11-0.73μM (VeroE6 cells).<br><i>In vivo</i> : ↓ clinical signs, respiratory tract viral load and virus titers, and transmission in ferrets <sup>60</sup> .                                                                                     |
|                                      | ODBG-P-RVn                          | Oral prodrug of GS-441524 (parent nucleoside of remdesivir) viral RdRp inhibitor.                                 | <i>In vitro</i> : EC <sub>50</sub> : <0.30μM (VeroE6, Calu-3, Huh-7.5, Caco-2, and human pluripotent stem cell-derived lung cells) <sup>61</sup> .<br><i>In vivo</i> : achieved therapeutic levels in plasma above EC <sub>90</sub> for SARS-CoV-2 in Syrian hamsters <sup>62</sup> . |
|                                      | Mindeudesivir (JT001; VV116)        | Oral derivate of GS-441524 (parent nucleoside of remdesivir) viral RdRp inhibitor.                                | <i>In vitro</i> : EC <sub>50</sub> : 0.24μM (VeroE6 cells) <sup>63</sup> .<br><i>In vivo</i> : ↓ active against SARS-CoV-2 WT and variants in mice <sup>64</sup> .                                                                                                                    |
| Other broad-spectrum RdRp inhibitors | Galidesivir (BCX4430)               | Broad-spectrum nucleoside analog viral RdRp inhibitor.                                                            | <i>In vitro</i> : EC <sub>90</sub> : <20.00μM (Vero76 and Caco2 cells).<br><i>In vivo</i> : ↓ weight loss, viral burden, and tissue pathology in Syrian hamsters <sup>65</sup> .                                                                                                      |
|                                      | Molnupiravir (EIDD-2801 or MK-4482) | Oral prodrug of the broad-spectrum ribonucleoside analog NHC; induces mutations in the replication of viral RdRp. | <i>In vitro</i> : EC <sub>50</sub> : <0.5μM (A549-hACE2 and Calu-3 cells) <sup>66</sup> .<br><i>In vivo</i> : ↓ lung viral load, virus titers, and tissue pathology in mice implanted with human lung tissue and Syrian hamsters, and ↓ transmission in ferrets <sup>67-70</sup> .    |
|                                      | Ribavirin                           | Broad-spectrum nucleoside analog viral RdRp inhibitor.                                                            | <i>In vitro</i> : EC <sub>50</sub> : 109.50μM <sup>57</sup> .                                                                                                                                                                                                                         |

|                          |                                   |                                                                                                                    |                                                                                                                                                                                                                                                                                                   |
|--------------------------|-----------------------------------|--------------------------------------------------------------------------------------------------------------------|---------------------------------------------------------------------------------------------------------------------------------------------------------------------------------------------------------------------------------------------------------------------------------------------------|
|                          | Triazavirin                       | Broad-spectrum nucleoside analog viral RdRp inhibitor that may also inhibit SARS-CoV-2 RdRp and M <sup>pro</sup> . | <i>In silico</i> : potential SARS-CoV-2 M <sup>pro</sup> inhibitor <sup>71</sup> .                                                                                                                                                                                                                |
| HCV inhibitors           | Bemnifosbuvir (AT-527, RO7496998) | HCV nucleotide analog viral RdRp inhibitor that also inhibits SARS-CoV-2 RdRp.                                     | <i>In vitro</i> : EC <sub>90</sub> : 0.53μM <sup>72</sup> .                                                                                                                                                                                                                                       |
|                          | Sofosbuvir                        | HCV NS5B inhibitor that inhibits SARS-CoV-2 RdRp.                                                                  | <i>In vitro</i> : EC <sub>50</sub> : 5.1 to >10.0μM (VeroE6, Huh7, and Calu-3 cells) <sup>73</sup> .                                                                                                                                                                                              |
| HIV inhibitors           | Azvodine                          | HIV RdRp inhibitor that also inhibits SARS-CoV-2 RdRp and may also have immunomodulatory effects.                  | <i>In vitro</i> : inhibits replication of SARS-CoV-2 (EC <sub>50</sub> : 4.31μM in VeroE6 cells) and HCoV-OC43 (1.2μM in H460 cells).<br>- <i>In vivo</i> : ↓ respiratory tract and blood viral load, lung viral antigen expression, and lung tissue pathology in rhesus macaques <sup>74</sup> . |
|                          | Tenofovir                         | HIV and HBV nucleotide analog RdRp inhibitor (tenofovir-emtricitabine) that also inhibits SARS-CoV-2 RdRp.         | <i>In vivo</i> : ↓ clinical signs and nasal wash virus titers in ferrets <sup>55,75</sup> .                                                                                                                                                                                                       |
| Influenza inhibitors     | Enisamium (FAV00A)                | Isonicotinic acid derivative anti-influenza drug that inhibits SARS-CoV-2 RdRp.                                    | <i>In vitro</i> : EC <sub>50</sub> : 1200μM in Caco2 cells <sup>76</sup> .                                                                                                                                                                                                                        |
|                          | Favipiravir                       | Anti-influenza nucleoside analog viral RdRp inhibitor that also inhibits SARS-CoV-2 RdRp.                          | <i>In vitro</i> : EC <sub>50</sub> : 61.88μM <sup>57</sup> .<br><i>In vivo</i> : ↓ lung viral load, virus titers, and tissue pathology in Syrian hamsters <sup>77</sup> .                                                                                                                         |
| Other repositioned drugs | Omipalisib                        | A PI3K/mTOR inhibitor that is predicted to inhibit SARS-CoV-2 RdRp.                                                | <i>In vitro</i> : EC <sub>50</sub> : <0.50μM (Vero and Calu-3 cells) <sup>56</sup> .                                                                                                                                                                                                              |
|                          | Tipifarnib                        | A farnesyltransferase inhibitor that is predicted to inhibit SARS-CoV-2 RdRp.                                      | <i>In vitro</i> : EC <sub>50</sub> : <12.00μM (Vero and Calu-3 cells) <sup>56</sup> .                                                                                                                                                                                                             |
| siRNAs                   | C6G25S sLNP-siUC7                 | siRNAs (with or without sLNPs) that target SARS-CoV-2 RdRp.                                                        | <i>In vitro</i> : EC <sub>50</sub> : <0.1nM.<br><i>In vivo</i> : intravenous sLNP-siUC7, inhaled                                                                                                                                                                                                  |



siR-7-EM/KK-46

C6G25S, and inhaled siR-7-EM/KK-46 ↓ lung viral load, virus titers, and tissue pathology in K18-hACE2 mice and Syrian hamsters<sup>78-80</sup>.

|                               |                     |                                         |                                                                                                                  |                                                                                                                                                                                            |
|-------------------------------|---------------------|-----------------------------------------|------------------------------------------------------------------------------------------------------------------|--------------------------------------------------------------------------------------------------------------------------------------------------------------------------------------------|
| <b>Helicase</b>               | Helicase inhibitors | Ranitidine bismuth citrate              | Anti- <i>Helicobacter pylori</i> infection and peptic ulcer disease drug that inhibits SARS-CoV-2 helicase.      | <i>In vitro</i> : EC <sub>50</sub> : 2.3μM (VeroE6 cells).<br><i>In vivo</i> : ↓ clinical signs, and lung viral load, virus titer, and tissue pathology in Syrian hamsters <sup>81</sup> . |
|                               |                     | FPA-124                                 | AKT inhibitor that inhibits SARS-CoV-2 helicase.                                                                 | <i>In vitro</i> : EC <sub>50</sub> : 14μM (VeroE6 cells) <sup>82</sup> .                                                                                                                   |
|                               |                     | Myricetin                               | Flavonoid that inhibits SARS-CoV-2 helicase.                                                                     | <i>In vitro</i> : EC <sub>50</sub> : 32μM (VeroE6 cells) <sup>82</sup> .                                                                                                                   |
|                               |                     | Suramin                                 | Anti-parasitic that inhibits SARS-CoV-2 helicase.                                                                | <i>In vitro</i> : EC <sub>50</sub> : 9.9μM (VeroE6 cells) <sup>82</sup> .                                                                                                                  |
|                               |                     | SSYA10-001                              | SARS-CoV helicase inhibitor that also inhibits SARS-CoV-2 helicase.                                              | <i>In vitro</i> : EC <sub>50</sub> : 81μM (VeroE6 cells) <sup>82</sup> .                                                                                                                   |
|                               |                     | sLNP-siHel2                             | siRNAs with sLNPs that target SARS-CoV-2 helicase.                                                               | <i>In vivo</i> : intravenous sLNP-siHel2 and inhaled C6G25S ↓ lung viral load, virus titers, and tissue pathology in K18-hACE2 mice <sup>78</sup> .                                        |
| <b>Exonuclease</b>            | HCV inhibitors      | Elbasivir<br>Pibrentasvir<br>Ombitasvir | Inhibit SARS-CoV-2 exonuclease.                                                                                  | <i>In vitro</i> : EC <sub>50</sub> : 0.4-0.7μM (Calu-3 cells) <sup>83</sup> .                                                                                                              |
| <b>Endoribonuclease</b>       | TPase inhibitor     | Tipiracil                               | TPase inhibitor used in the treatment of colorectal cancer that inhibits SARS-CoV-2 SARS-CoV-2 endoribonuclease. | <i>In vitro</i> : inhibition of endoribonuclease activity but limited effect on viral replication (A549-hCE2 cells) <sup>84</sup> .                                                        |
| <b>2'-O-methyltransferase</b> | Miscellaneous       | Compound 11<br>Nsp10 peptides           | <i>In silico</i> prediction of high binding affinities with SARS-CoV-2 2'-O-methyltransferase.                   | <i>In silico</i> : uncertain <i>in vitro</i> or <i>in vivo</i> antiviral activity <sup>85,86</sup> .                                                                                       |
| <b>Multiple enzymes</b>       | Antimycobacterial   | Clofazimine                             | Inhibits SARS-CoV-2 helicase and                                                                                 | <i>In vitro</i> : EC <sub>50</sub> : 0.31μM (VeroE6 cells).                                                                                                                                |

|                |                                                                      |                                                                                                                          |                                                                                                                                                                                                                 |
|----------------|----------------------------------------------------------------------|--------------------------------------------------------------------------------------------------------------------------|-----------------------------------------------------------------------------------------------------------------------------------------------------------------------------------------------------------------|
|                |                                                                      | RdRp.                                                                                                                    | <i>In vivo</i> : ↓ lung viral load, virus titers, and tissue pathology in Syrian hamsters <sup>87</sup> .                                                                                                       |
| HCV inhibitors | Simeprevir<br>Grazoprevir<br>Paritaprevir<br>Vaniprevir              | Inhibits SARS-CoV-2 M <sup>pro</sup> , PL <sup>pro</sup> , and/or RdRp.                                                  | <i>In vitro</i> : EC <sub>50</sub> : 4.082μM (VeroE6 cells) <sup>88,89</sup> .                                                                                                                                  |
|                | Daclatasvir<br>Ledipasvir<br>Velpatasvir                             | Inhibit SARS-CoV-2 RdRp and exonuclease.                                                                                 | <i>In vitro</i> : EC <sub>50</sub> : 0.6-1.1μM (daclatasvir in VeroE6, Huh7, and Calu-3 cells) <sup>73,74,83</sup> .                                                                                            |
| Others         | Carmofur<br>Disulfiram<br>Ebselen<br>PX-12<br>Shikonin<br>Tideglusib | Non-specific inhibition of SARS-CoV-2 PL <sup>pro</sup> , M <sup>pro</sup> , nsp13 ATPase, and/or nsp14 exoribonuclease. | <i>In vitro</i> : inhibits SARS-CoV-2 PL <sup>pro</sup> , M <sup>pro</sup> , nsp13 ATPase, and/or nsp14 exoribonuclease activities; EC <sub>50</sub> : 24.30μM (carmofur in VeroE6 cells) <sup>47,90-92</sup> . |

### (C) Other viral targets

|                      |                                                                                              |                                                                                                                                                                                                   |                                                                                                   |
|----------------------|----------------------------------------------------------------------------------------------|---------------------------------------------------------------------------------------------------------------------------------------------------------------------------------------------------|---------------------------------------------------------------------------------------------------|
| Viroporin inhibitors | Amantadine<br>Emodin<br>Epigallocatechin<br>Hexamethylene-amiloride<br>Quercetin<br>Xanthene | Inhibits SARS-CoV-2 envelope protein and other viroporins from inducing intracellular membrane remodelling to generate membrane vesicles as viral replication site and/or ion channel activities. | <i>In vitro</i> : EC <sub>50</sub> : 83-119μM (amantadine in VeroE6 cells) <sup>93-95</sup> .     |
| siRNAs               | siORF1 (O1 to O3)<br>siL (L1 to L3)<br>siN (N1 to N11)<br>siU (U1 to U3)                     | siRNA targeting different genomic and subgenomic RNAs of SARS-CoV-2.                                                                                                                              | <i>Ex vivo</i> : siORF1 (O3) ↓ viral load in <i>ex vivo</i> lung culture model <sup>96,97</sup> . |

**Abbreviations:** CXR, chest X-ray; DARPin, designated ankyrin repeat protein; FRIL, Flt3 receptor interacting lectin; HCV, hepatitis C virus; HIV, human immunodeficiency virus; M<sup>pro</sup>, main protease; NHC, beta-D-N4-hydroxycytidine; PL<sup>pro</sup>, papain-like protease; RdRp, RNA-dependent RNA polymerase; siRNA, small interfering RNA; sLNP, stealth lipid nanoparticle; TMEM16, transmembrane protein 16; TPase, thymidine phosphorylase.

SUPPLEMENTARY TABLE 2 | **Representative host-targeting therapeutic candidates for COVID-19.**

| Target                          | Drug class                  | Examples                                              | Antiviral mechanism                                                                                                                       | Pre-clinical antiviral data                                                                                                                                                                                       |
|---------------------------------|-----------------------------|-------------------------------------------------------|-------------------------------------------------------------------------------------------------------------------------------------------|-------------------------------------------------------------------------------------------------------------------------------------------------------------------------------------------------------------------|
| <i>(A) Host immune response</i> |                             |                                                       |                                                                                                                                           |                                                                                                                                                                                                                   |
| <b>Broad-spectrum</b>           |                             |                                                       |                                                                                                                                           |                                                                                                                                                                                                                   |
|                                 | Alkaloid                    | Colchicine                                            | Anti-mitotic drug that inhibits microtubule assembly and modulates multiple inflammatory pathways.                                        | Clinical uses: inflammatory disorders such as gout, pericarditis, Behçet's disease, and familial Mediterranean fever.<br>Uncertain <i>in vitro</i> and <i>in vivo</i> efficacy against SARS-CoV-2 <sup>98</sup> . |
|                                 | Indole-imidazole derivative | Sabizabulin (VERU-111)                                | Novel bis-indole microtubule depolymerisation agent with anti-inflammatory and potentially antiviral effects.                             | <i>In vitro</i> : ↓ inflammatory cytokines in endotoxin-stimulated mouse spleen cells <sup>99</sup> .                                                                                                             |
|                                 | Glucocorticoids             | Dexamethasone<br>Methylprednisolone<br>Hydrocortisone | Systemic corticosteroids with broad-spectrum anti-inflammatory effects.                                                                   | <i>In vivo</i> : combination of systemic methylprednisolone and remdesivir ↓ body weight loss, viral loads, and tissue inflammation in Syrian hamsters <sup>100</sup> .                                           |
|                                 |                             | Budesonide<br>Ciclesonide                             | Inhaled corticosteroids that ↓ airway inflammation.<br>Ciclesonide also targets SARS-CoV-2 nsp3 and/or nsp4 to inhibit viral replication. | <i>In vitro</i> : EC <sub>50</sub> : 4.33μM (ciclesonide in Vero cells) and EC <sub>90</sub> : 0.55μM in human bronchial tracheal epithelial cells <sup>20,101</sup> .                                            |
| <b>Interferons</b>              |                             |                                                       |                                                                                                                                           |                                                                                                                                                                                                                   |
| Type I IFNs                     | Recombinant type I          | Recombinant IFN-α                                     | A family of cytokines with                                                                                                                | Clinical uses: HBV and HCV infections (IFN-α)                                                                                                                                                                     |

|                      |                                         |                                             |                                                                          |                                                                                                                                                                                                                                                                                                                                                                                                                                                                                                                                                                                                                                              |
|----------------------|-----------------------------------------|---------------------------------------------|--------------------------------------------------------------------------|----------------------------------------------------------------------------------------------------------------------------------------------------------------------------------------------------------------------------------------------------------------------------------------------------------------------------------------------------------------------------------------------------------------------------------------------------------------------------------------------------------------------------------------------------------------------------------------------------------------------------------------------|
|                      | IFNs                                    | Recombinant IFN- $\beta$                    | broad-spectrum antiviral activities.                                     | and multiple sclerosis (IFN- $\beta$ ).<br><i>In vitro</i> : potent antiviral activity against SARS-CoV-2 alone or in combination with other antivirals <sup>54,102</sup> .<br><i>In vivo</i> : early use of intranasal IFN- $\alpha$ $\downarrow$ weight loss, lung viral load and virus titers, and tissue damage in Syrian hamsters <sup>103</sup> .                                                                                                                                                                                                                                                                                      |
| <b>Type II IFNs</b>  | Antibodies against type II IFNs         | Neutralizing antibody against IFN- $\gamma$ | Neutralizing antibodies that block IFN- $\gamma$ -mediated inflammation. | <i>In vitro</i> : IFN- $\gamma$ $\uparrow$ viral replication in human colonic organoids <sup>104</sup> .<br><i>In vivo</i> : neutralizing antibodies against IFN- $\gamma$ and TNF- $\alpha$ co-treatment $\uparrow$ survival and $\downarrow$ tissue damage of K18-hACE2 mice <sup>105</sup> .                                                                                                                                                                                                                                                                                                                                              |
| <b>Type III IFNs</b> | Recombinant type III IFNs               | Recombinant IFN- $\lambda$                  | A family of cytokines with broad-spectrum antiviral activities.          | <i>In vitro</i> : pegylated IFN- $\lambda$ 1 $\downarrow$ SARS-CoV-2 replication in primary human airway epithelial cells <sup>106</sup> .<br><i>In vivo</i> : early use of pegylated IFN- $\lambda$ 1 $\downarrow$ SARS-CoV-2 replication in mice <sup>106</sup> . Intranasal IFN- $\lambda$ 2 $\downarrow$ respiratory tract viral load, virus titers, and tissue damage in K18-hACE2 mice <sup>107</sup> .                                                                                                                                                                                                                                |
| <b>IFN inducers</b>  | Synthetic double-stranded RNA analogues | Poly(I:C)                                   | TLR3/MDA5 synthetic agonist that potently induces IFN production.        | <i>In vitro</i> : poly(I:C)-primed mesenchymal stem cells exhibit $\uparrow$ antiviral and immunomodulatory response pathways and $\uparrow$ expression of antiviral proteins (MX1, IFITM3, and OAS1). Addition of poly(I:C)-primed mesenchymal stem cells to COVID-19 patients' whole blood $\downarrow$ inflammatory neutrophils and $\uparrow$ M2 monocytes with enhanced phagocytic effector function <sup>108</sup> .<br><i>In vivo</i> : early use of intranasal poly(I:C) results in $\uparrow$ survival rate, $\downarrow$ viral loads, and $\downarrow$ lung and brain cytokine storm in K18-hACE2-transgenic mice <sup>109</sup> . |
| <b>Interleukins</b>  |                                         |                                             |                                                                          |                                                                                                                                                                                                                                                                                                                                                                                                                                                                                                                                                                                                                                              |

|             |                 |                                        |                                                                                                                                  |                                                                                                                                                                                                                                               |
|-------------|-----------------|----------------------------------------|----------------------------------------------------------------------------------------------------------------------------------|-----------------------------------------------------------------------------------------------------------------------------------------------------------------------------------------------------------------------------------------------|
| <b>IL-1</b> | IL-1 inhibitors | Anakinra<br>Canakinumab                | IL-1 receptor antagonist (eg: anakinra) and mAb (eg: canakinumab) that ↓ IL1-mediated immunopathologies.                         | Clinical uses: immune disorders such as rheumatoid arthritis, systemic juvenile idiopathic arthritis, Still's disease, and neonatal-onset multisystem inflammatory disease. Anakinra has been used to treat pediatric patients with MIS-C.    |
| <b>IL-6</b> | IL-6 inhibitors | Sarilumab<br>Siltuximab<br>Tocilizumab | Anti-IL-6 receptor mAb (eg: tocilizumab and sarilumab) and anti-IL-6 mAb (eg: siltuximab) that ↓ IL6-mediated immunopathologies. | Clinical uses: immune disorders such as rheumatoid arthritis, CAR T-cell therapy-induced cytokine release syndrome, and Castleman disease. Tocilizumab and sarilumab may be used in combination of corticosteroids for treatment of COVID-19. |

#### Other inflammatory mediators

|            |                          |                                                                                                          |                                                                                                                                             |                                                                                                                                                                                                                                                                            |
|------------|--------------------------|----------------------------------------------------------------------------------------------------------|---------------------------------------------------------------------------------------------------------------------------------------------|----------------------------------------------------------------------------------------------------------------------------------------------------------------------------------------------------------------------------------------------------------------------------|
| <b>BET</b> | BRD2 and BRD4 inhibitors | Mivebresib (ABBV-075)<br>ABBV-744<br>Apabetalone (RVX-208)<br>CPI-0610<br>dBET6<br>JQ-1<br>MZ1<br>SF2523 | Inhibits BRD2 and BRD4-mediated regulation of gene transcription.                                                                           | <i>In vitro</i> : EC <sub>50</sub> : 1.52μM (SF2523 in Vero STAT1 KO cells) <sup>110,111</sup> .                                                                                                                                                                           |
| <b>BTK</b> | BTK inhibitors           | Acalabrutinib<br>Ibrutinib<br>Zanubrutinib                                                               | Inhibits B-cell and macrophage activation, signalling, and development to ↓ immunopathologies.                                              | Clinical uses: B-cell malignancies such as chronic lymphocytic leukemia and mantle cell lymphoma, and chronic GVHD. Uncertain <i>in vitro</i> and <i>in vivo</i> anti-SARS-CoV-2 efficacy.                                                                                 |
| <b>JAK</b> | JAK inhibitors           | Baricitinib<br>Ruxolitinib<br>Tofacitinib                                                                | Interferes with phosphorylation of key proteins involved in the inflammatory response. Baricitinib may also ↓ clathrin-mediated endocytosis | Clinical uses: immune disorders such as rheumatoid arthritis, psoriatic arthritis, juvenile idiopathic arthritis, and ulcerative colitis, and hematological disorders such as myelofibrosis, polycythemia vera, and acute GVHD. Used in combination with remdesivir and/or |

|                                |                                    |                                                                                                                        |                                                                                                                                                                                                                                                |                                                                                                                                                                                                                    |
|--------------------------------|------------------------------------|------------------------------------------------------------------------------------------------------------------------|------------------------------------------------------------------------------------------------------------------------------------------------------------------------------------------------------------------------------------------------|--------------------------------------------------------------------------------------------------------------------------------------------------------------------------------------------------------------------|
|                                |                                    |                                                                                                                        | of SARS-CoV-2 <sup>112</sup> .                                                                                                                                                                                                                 | corticosteroids.<br><i>In vivo</i> : baricitinb ↓ inflammation and pulmonary tissue pathologies in SARS-CoV-2-infected rhesus macaques <sup>113</sup> .                                                            |
| <b>Sigma-1 and -2 receptor</b> | SSRI                               | Fluvoxamine                                                                                                            | Reduces pro-inflammatory cytokine production through binding to sigma-1 receptor on immune cells; may also ↓ SARS-CoV-2 entry through inhibition of acid sphingomyelinase and ceramide-enriched membrane domain formation <sup>114,115</sup> . | Clinical uses: depression and obsessive-compulsive disorder.<br>Uncertain <i>in vitro</i> and <i>in vivo</i> efficacy against SARS-CoV-2.                                                                          |
|                                |                                    | Chloroquine<br>Clemastine<br>Haloperidol<br>PB28<br>PD-144418<br>RS-PPCC                                               | Perturbs sigma receptor-mediated cell stress response.                                                                                                                                                                                         | <i>In vitro</i> : ↓ viral antigen ± titer (VeroE6 cells) <sup>116</sup> .                                                                                                                                          |
| <b>Histamine receptor</b>      | H <sub>2</sub> receptor antagonist | Famotidine                                                                                                             | Inhibits histamine-induced TLR3 expression and cytokine release in SARS-CoV-2 infected cells.                                                                                                                                                  | Clinical uses: peptic ulcer disease and gastroesophageal reflux disease.<br><i>In vitro</i> : no effect on viral replication, but ↓ CCL-2 and IL-6 expression levels in SARS-CoV-2 infected cells <sup>117</sup> . |
| <b>GM-CSF</b>                  | Anti-GM-CSF mAbs                   | Gimsilumab<br>Lenzilumab<br>Mavrilimumab<br>Namilumab<br>Otilimab                                                      | Blocks interaction between GM-CSF and its cell surface receptor or the intracellular signalling of GM-CSF to ↓ immunopathologies.                                                                                                              | Uncertain <i>in vitro</i> and <i>in vivo</i> efficacy against SARS-CoV-2.                                                                                                                                          |
| <b>Complements</b>             | Complement inhibitors              | AMY-101 (anti-C3)<br>Eculizumab (anti-C5)<br>Ravulizumab (anti-C5)<br>Zilucoplan (anti-C5)<br>Vilobelimumab (anti-C5a) | Anti-complement mAbs and peptides that ↓ complement-mediated immunopathologies.                                                                                                                                                                | Clinical uses: myasthenia gravis, paroxysmal nocturnal hemoglobinuria <sup>118-121</sup> .                                                                                                                         |

|              |                                                           |                                                       |                                                                                                                      |                                                                                                                                                                                                                                                        |
|--------------|-----------------------------------------------------------|-------------------------------------------------------|----------------------------------------------------------------------------------------------------------------------|--------------------------------------------------------------------------------------------------------------------------------------------------------------------------------------------------------------------------------------------------------|
| <b>TOP1</b>  | TOP1 inhibitors                                           | Topotecan                                             | Inhibits TOP1-mediated inflammation.                                                                                 | Clinical uses: chemotherapeutic agent for ovarian, cervical, and lung cancers.<br><i>In vitro</i> : ↓ SARS-CoV-2-induced inflammatory gene expression<br><i>In vivo</i> : ↓ inflammation in hamsters and ↑ survival in K18-hACE2 mice <sup>122</sup> . |
| <b>HMGB1</b> | HMGB1 inhibitors                                          | Glycyrrhizin                                          | Inhibits HMGB1-mediated inflammatory response, lung ACE2 mRNA expression, and inhibits SARS-CoV-2 M <sup>pro</sup> . | <i>In vitro</i> : EC <sub>50</sub> : 0.44mg/mL (VeroE6 cells) <sup>123,124</sup> .                                                                                                                                                                     |
| <b>HDAC2</b> | HDAC inhibitors                                           | Apicidin<br>Belinostat<br>Vorinostat<br>Valproic acid | Inhibit HDAC2-mediated inflammatory and interferon response.                                                         | <i>In vitro</i> : ↓ ACE2 expression but uncertain effects on SARS-CoV-2 replication <sup>116,125</sup> .                                                                                                                                               |
| <b>S1P</b>   | S1P receptor modulators and sphingosine kinase inhibitors | Fingolimod<br>Opaganib                                | Inhibits S1P synthesis and the associated inflammatory response.                                                     | Clinical uses: multiple sclerosis (fingolimod).<br><i>In vitro</i> : ↓ viral load in human bronchial epithelial cells <sup>126</sup> .                                                                                                                 |

---

**(B) Host factors involved in the viral replication cycle**

---

**Receptor**

---

|             |                           |                                   |                                                                        |                                                                                                                                                                                                                                                                           |
|-------------|---------------------------|-----------------------------------|------------------------------------------------------------------------|---------------------------------------------------------------------------------------------------------------------------------------------------------------------------------------------------------------------------------------------------------------------------|
| <b>ACE2</b> | Recombinant soluble hACE2 | ACE2-1-618-DDC-ABD<br>hACE2 1-618 | Act as decoys to compete with cell-bound ACE2 to ↓ spike-ACE2 binding. | <i>In vitro</i> : ↓ viral load of SARS-CoV-2 WT and variants and human kidney organoids <sup>127</sup> .<br><i>In vivo</i> : ↓ clinical scores, lung viral load and virus titers, and tissue damage in K18-hACE2-transgenic mice and Syrian hamsters <sup>128,129</sup> . |
|             | Bivalent ACE2-Fc          | M81                               | Competes with cell-bound ACE2 and possesses robust                     | <i>In vitro</i> : cross-neutralizes SARS-CoV-2 WT and variants with low nM EC <sub>50</sub> .                                                                                                                                                                             |

|  |                                                    |             |                                                                                                                     |                                                                                                                                                                                                                                                  |
|--|----------------------------------------------------|-------------|---------------------------------------------------------------------------------------------------------------------|--------------------------------------------------------------------------------------------------------------------------------------------------------------------------------------------------------------------------------------------------|
|  |                                                    |             | Fc-effector functions, including antibody-dependent cellular cytotoxicity, phagocytosis, and complement deposition. | <i>In vivo</i> : ↑ survival and ↓ respiratory tract viral load in K18-hACE2-transgenic mice <sup>130</sup> .                                                                                                                                     |
|  | Circulating extracellular vesicles expressing ACE2 | evACE2      | Act as decoys to compete with cell-bound ACE2 to ↓ spike-ACE2 binding.                                              | <i>In vitro</i> : neutralizes SARS-CoV-2 WT and variants with about 80-fold higher potency than recombinant soluble ACE2.<br><i>In vivo</i> : intranasal evACE2 ↑ survival and ↓ lung viral load in K18-hACE2-transgenic mice <sup>[114]</sup> . |
|  | PPAR-α agonist                                     | Fenofibrate | Destabilizes RBD-ACE2 binding and may reverse alterations in lipid metabolism induced by SARS-CoV-2.                | <i>In vitro</i> : EC <sub>50</sub> : 7-14μM (Vero cells) <sup>131</sup> .                                                                                                                                                                        |

---

#### Attachment factors and/or co-receptors

---

|                          |                                                |                                                                                                         |                                                                                                                         |                                                                                                                                                                           |
|--------------------------|------------------------------------------------|---------------------------------------------------------------------------------------------------------|-------------------------------------------------------------------------------------------------------------------------|---------------------------------------------------------------------------------------------------------------------------------------------------------------------------|
| <b>HSPGs</b>             | Sulfated glycans                               | LMWH<br>Fucoidans<br>Mucopolysaccharide polysulfate<br>Pentosan polysulfate<br>Unfractionated heparin   | Competitive inhibitors of heparan sulfate.                                                                              | Clinical uses: anticoagulation (heparin) and interstitial cystitis (pentosane polysulfate).<br><i>In vitro</i> : ↓ viral entry <sup>132-135</sup> .                       |
|                          | Other inhibitors of HSPG-dependent endocytosis | BNTX<br>Brilacidin<br>Lactoferrin<br>Mitoxantrone<br>Piceatannol<br>Raloxifene<br>Sunitinib<br>Tilorone | Directly inhibits heparan sulfate or disrupts actin network to indirectly inhibit heparan sulfate-assisted viral entry. | <i>In vitro</i> : ↓ viral entry and virus-induced CPE; EC <sub>50</sub> : <23μM (brilacidin in Vero, Calu-3, Caco-2, Huh-7, and 293T-ACE2 cells) <sup>132,136,137</sup> . |
| <b>CD147 (basigin or</b> | Humanized anti-                                | Meplazumab (HP6H8)                                                                                      | Inhibits CD147-mediated                                                                                                 | Clinical uses: severe eosinophilic asthma,                                                                                                                                |



|                               |                                 |                                             |                                                                                                        |                                                                                                                                                                                                                                                                                                             |
|-------------------------------|---------------------------------|---------------------------------------------|--------------------------------------------------------------------------------------------------------|-------------------------------------------------------------------------------------------------------------------------------------------------------------------------------------------------------------------------------------------------------------------------------------------------------------|
| <b>EMMPRIN)</b>               | CD147 antibody                  |                                             | SARS-CoV-2 entry.                                                                                      | eosinophilic granulomatosis, and hypereosinophilic syndrome.<br><i>In vitro</i> : EC <sub>50</sub> : 15.16µg/ml <sup>138</sup> .                                                                                                                                                                            |
| <b>Entry</b>                  |                                 |                                             |                                                                                                        |                                                                                                                                                                                                                                                                                                             |
| <b>Surface host proteases</b> | Serine protease inhibitors      | Camostat<br>Nafamostat<br>Upamostat         | Inhibits spike-TMPRSS2 binding to reduce TMPRSS2-mediated virus entry into host cells.                 | Clinical uses: chronic pancreatitis and reflux esophagitis.<br><i>In vitro</i> : EC <sub>50</sub> : 2.2nM (HAE cells) to 22.50µM (nafamostat, VeroE6 cells) <sup>57,139,140</sup> .<br><i>In vivo</i> : intranasal nafamostat ↓ virus titers, weight loss, and mortality in K18-hACE2 mice <sup>141</sup> . |
|                               | Peptidomimetics                 | N-0385                                      | Inhibits TMPRSS-2-mediated virus entry into host cells.                                                | <i>In vitro</i> : EC <sub>50</sub> : 2.8nM (Calu-3 cells) <sup>142</sup> .<br><i>In vivo</i> : ↓ morbidity and mortality in K18-hACE2 mice <sup>142</sup> .                                                                                                                                                 |
|                               | Kallikrein-related B1 inhibitor | Avoralstat                                  | Inhibits TMPRSS-2-mediated virus entry into host cells.                                                | <i>In vitro</i> : inhibits SARS-CoV-2 entry and replication in human airway epithelial cells <sup>143</sup> .<br><i>In vivo</i> : ↓ lung tissue viral titers and body weight loss in Ad5-hACE2-transduced BALB/c mice <sup>143</sup> .                                                                      |
|                               | Mucolytics                      | Bromhexine                                  | Inhibits spike-TMPRSS2 binding of TMPRSS2 to reduce TMPRSS2-mediated virus entry into host cells.      | <i>In vitro</i> : inhibits TMPRSS2 with EC <sub>50</sub> : 0.75µM and SARS-CoV-2 entry in lung cells <sup>144</sup> .                                                                                                                                                                                       |
|                               | Antiandrogens                   | Apalutamide<br>Bicalutamide<br>Enzalutamide | Inhibits transcriptional expression of TMPRSS2 to reduce TMPRSS2-mediated virus entry into host cells. | <i>In vivo</i> : ↓ TMPRSS2 levels in human lung cells and mouse lung <sup>145</sup> .                                                                                                                                                                                                                       |
| <b>Endosomal host</b>         | Adamantanes                     | Amantadine                                  | Inhibits cathepsin L-mediated                                                                          | <i>In vitro</i> : EC <sub>50</sub> : 83-119µM (amantadine in                                                                                                                                                                                                                                                |

|                                         |                                   |  |                                                                                                                                                                           |                                                                                                                                                                                                                                                                                             |
|-----------------------------------------|-----------------------------------|--|---------------------------------------------------------------------------------------------------------------------------------------------------------------------------|---------------------------------------------------------------------------------------------------------------------------------------------------------------------------------------------------------------------------------------------------------------------------------------------|
| <b>proteases</b>                        |                                   |  | virus entry into host cells.                                                                                                                                              | VeroE6 cells) <sup>93</sup> .<br><i>In vivo</i> : ↓ SARS-CoV-2 pseudovirus infection in hACE2 humanized mice <sup>146</sup> .                                                                                                                                                               |
| Cysteine protease inhibitor             | Aloxistatin (E64d)                |  | Inhibits cathepsin L-mediated virus entry into host cells.                                                                                                                | <i>In vitro</i> : ↓ SARS-CoV-2 pseudovirus infection (293T-hACE2 cells) <sup>147</sup> .<br><i>In vivo</i> : ↓ SARS-CoV-2 pseudovirus infection in hACE2 humanized mice <sup>146</sup> .                                                                                                    |
| Glycopeptides                           | Dalbavancin                       |  | Inhibits cathepsin L-mediated virus entry into host cells.                                                                                                                | <i>In vitro</i> : EC <sub>50</sub> : 12nM (VeroE6 cells).<br><i>In vivo</i> : ↓ viral load and pulmonary tissue pathologies in hACE2 mice and rhesus macaques <sup>148</sup> .                                                                                                              |
| Selective cathepsin L inhibitors        | SID 26681509                      |  | Inhibits cathepsin L-mediated virus entry into host cells.                                                                                                                | <i>In vitro</i> : ↓ SARS-CoV-2 pseudovirus infection (293T-hACE2 cells) <sup>147</sup> .                                                                                                                                                                                                    |
| <b>Other endosomal entry regulators</b> |                                   |  |                                                                                                                                                                           |                                                                                                                                                                                                                                                                                             |
| 4-aminoquinolines                       | Chloroquine<br>Hydroxychloroquine |  | Increases endosomal pH to inhibit fusion of SARS-CoV-2 with host cell membrane, glycosylation of ACE2, and transport of SARS-CoV-2 from early endosomes to endolysosomes. | <i>In vitro</i> : EC <sub>50</sub> : 1.13-7.36μM (chloroquine) and 4.06-12.96μM (hydroxychloroquine) (VeroE6 cells) <sup>57,149</sup> .<br><i>In vivo</i> : ↓ lung viral load and tissue pathology in hACE2 mice, but not in hamsters, ferrets, and rhesus macaques <sup>55,150-152</sup> . |
| Bis-benzylisoquinoline alkaloids        | Berberamine                       |  | Endosomal acidification                                                                                                                                                   | <i>In vitro</i> : EC <sub>50</sub> : 2.4μM (VeroE6 cells) <sup>153</sup> .                                                                                                                                                                                                                  |
| Cardiac glycosides                      | Bufalin<br>Digoxin<br>Ouabain     |  | Inhibits Na <sup>+</sup> /K <sup>+</sup> -ATPase-mediated regulation of intracellular ion homeostasis and/or ATP1A1-mediated Src signalling <sup>154</sup> .              | <i>In vitro</i> : EC <sub>50</sub> : <0.2μM (Vero and VeroE6 cells) <sup>155-157</sup> .                                                                                                                                                                                                    |
| Macrolides                              | Bafilomycin A1                    |  | Endosomal acidification                                                                                                                                                   | <i>In vitro</i> : ↓ viral load (Vero, Huh-7, and 293T-hACE2 cells).                                                                                                                                                                                                                         |

|                                          |                     |                                                                                 |                                                                                                                   |                                                                                                                                                                                                                                                    |
|------------------------------------------|---------------------|---------------------------------------------------------------------------------|-------------------------------------------------------------------------------------------------------------------|----------------------------------------------------------------------------------------------------------------------------------------------------------------------------------------------------------------------------------------------------|
|                                          |                     |                                                                                 |                                                                                                                   | <i>In vivo</i> : ↓ lung viral load and tissue pathology in hACE2 mice <sup>150</sup> .                                                                                                                                                             |
|                                          | Phenothiazines      | Chlorpromazine                                                                  | Inhibits viral entry through clathrin-mediated endocytosis.                                                       | <i>In vitro</i> : EC <sub>50</sub> : 8.2μM (VeroE6 and A549-ACE2 cells) <sup>158</sup> .                                                                                                                                                           |
|                                          | PIK-fyve inhibitors | Apilimod<br>Vacuolin-1<br>YM201636                                              | Inhibits PIK-fyve-mediated synthesis of PI(3,5)P2 which regulates endosome maturation.                            | <i>In vitro</i> : ↓ SARS-CoV-2 pseudovirus entry (apilimod, 293/hACE2 cells) <sup>147,159,160</sup> .                                                                                                                                              |
|                                          | RAB7A siRNA         | RAB7A knockout                                                                  | ↓ viral entry by intracellular ACE2 sequestration through altered endosomal trafficking.                          | <i>In vitro</i> : ↓ cell surface expression and ↑ endosomal accumulation of ACE2 <sup>159</sup> .                                                                                                                                                  |
|                                          | TPC2 antagonists    | Naringenin<br>Tetrandrine                                                       | Inhibits TPC2-mediated endolysosomal functions and virus entry.                                                   | <i>In vitro</i> : ↓ SARS-CoV-2-induced CPE (naringenin, VeroE6 cells) and pseudovirion entry (tetrandrine, 293/hACE2 cells) <sup>147,162</sup> .                                                                                                   |
| <b>Other host proteases</b>              | Furin inhibitors    | Agmatine<br>Andrographolide<br>BOS-981 and BOS-138<br>CMK<br>Naphthofluorescein | Inhibits furin-mediated cleavage at the S1/S2 polybasic cleavage (PRRAR) site which is important for virus entry. | <i>In vitro</i> : ↓ viral load (EC <sub>50</sub> of CMK: 0.057μM), CPE, spike cleavage and syncytia formation (VeroE6 and MK2 cells) <sup>162-166</sup> .                                                                                          |
|                                          | MT-MMP inhibitors   | Incyclinide<br>Prinomastat<br>20(R)-ginsenoside Rh2                             | Inhibits MT-MMP-mediated virus entry into host cells.                                                             | <i>In vitro</i> : ↓ viral load in Calu-3 and Caco-2 cells.<br><i>In vivo</i> : intranasal incyclinide or 20(R)-ginsenoside Rh2 ↓ lung viral load, virus titers, viral antigen expression, and tissue pathology in Syrian hamsters <sup>167</sup> . |
| <b>Translation and protein synthesis</b> |                     |                                                                                 |                                                                                                                   |                                                                                                                                                                                                                                                    |
| <b>AP2M1</b>                             | AP2M1 inhibitors    | ACA                                                                             | Inhibits AP2M1-YxxØ motif interaction-mediated                                                                    | <i>In vitro</i> : broad-spectrum activity against SARS-CoV-2 and other CoVs, as well as multiple                                                                                                                                                   |

|                                   |                                      |                                                              |                                                                                                                                    |                                                                                                                                                                                                                                                |
|-----------------------------------|--------------------------------------|--------------------------------------------------------------|------------------------------------------------------------------------------------------------------------------------------------|------------------------------------------------------------------------------------------------------------------------------------------------------------------------------------------------------------------------------------------------|
|                                   |                                      |                                                              | intracellular virus trafficking.                                                                                                   | DNA and RNA families <sup>168</sup> .                                                                                                                                                                                                          |
| <b>Translation elongation</b>     | Translation elongation inhibitors    | Cycloheximide                                                | Inhibits translation elongation.                                                                                                   | <i>In vitro</i> : EC <sub>50</sub> : 0.17μM (Caco-2 cells) <sup>169</sup> .                                                                                                                                                                    |
| <b>40S ribosomal protein S14</b>  | 40S ribosomal protein S14 inhibitors | Emetine                                                      | Inhibits 40S ribosomal protein S14.                                                                                                | <i>In vitro</i> : EC <sub>50</sub> : 0.47μM (Caco-2 cells) <sup>169</sup> .                                                                                                                                                                    |
| <b>eEF1A</b>                      | eEF1A inhibitors                     | Plitidepsin<br>Ternatin-4                                    | Inhibits eEF1A-mediated mRNA translation, protein synthesis and viral replication.                                                 | Clinical use: multiple myeloma<br><i>In vitro</i> : EC <sub>50</sub> : <0.8nM (plitidepsin in VeroE6 and 293T-hACE2 cells).<br><i>In vivo</i> : sc plitidepsin ↓ lung virus titer and tissue pathology in K18-hACE2 mice <sup>116,170</sup> .  |
| <b>eIF4A</b>                      | eIF4A inhibitor                      | Zotatifin                                                    | Inhibits eEF1A-mediated mRNA translation, protein synthesis and viral replication.                                                 | Clinical use: phase 1 clinical trial for cancer<br><i>In vitro</i> : EC <sub>50</sub> : 0.037μM <sup>116</sup> .                                                                                                                               |
| <b>PI3K/AKT/mTOR</b>              | PI3K/AKT/mTOR inhibitors             | ASTEX<br>Everolimus<br>OSI-127<br>Rapamycin<br>Temisirolimus | Inhibits PI3K/AKT/mTOR-mediated protein synthesis and viral replication.                                                           | <i>In vitro</i> : ↓ SARS-CoV-2 viral load (Vero, Calu-3, and 293T-ACE2 cells) <sup>110,171-173</sup> .                                                                                                                                         |
| <b>Viral glycoprotein folding</b> | Iminosugars                          | Celgosivir<br>EB-0281<br>Miglustat<br>MON-DNJ                | Inhibits α-glucosidases I and II which are involved in the early stages of glycoprotein N-linked oligosaccharide processing in ER. | Clinical uses: HCV (celgosivir) and lysosome storage diseases (miglustat).<br><i>In vitro</i> : EC <sub>50</sub> : 1μM (celgosivir, Huh7-hACE2 cells), 9.5μM (EB-0281, Calu-3 cells) and 45.2μM (miglustat, Calu-3 cells) <sup>174,175</sup> . |
| <b>Sec61</b>                      | Sec61 inhibitors                     | PS3061                                                       | Inhibits Sec61-mediated protein biogenesis.                                                                                        | <i>In vitro</i> : ↓ virus titer (VeroE6 cells) <sup>116</sup> .                                                                                                                                                                                |
| <b>UPR activation</b>             | Antibiotics                          | Clofoctol                                                    | Inhibits translation of viral RNA possibly through activation of UPR pathways                                                      | <i>In vitro</i> : EC <sub>50</sub> : 12.41μM (Vero-81 cells) <sup>176</sup> .<br><i>In vivo</i> : intraperitoneal clofoctol ↓ lung virus titer and inflammation in K18-hACE2 mice <sup>176</sup> .                                             |

---

**Lipid and cholesterol biosynthesis**


---

|                          |                              |                                              |                                                                                                                                                        |                                                                                                                                                                                                                                                                                  |
|--------------------------|------------------------------|----------------------------------------------|--------------------------------------------------------------------------------------------------------------------------------------------------------|----------------------------------------------------------------------------------------------------------------------------------------------------------------------------------------------------------------------------------------------------------------------------------|
| <b>ATP citrate lyase</b> | ATP citrate lyase inhibitors | Bempedoic acid<br>SB 204990                  | Inhibits the conversion of acetyl-CoA from citrate in the citrate induced <i>de novo</i> lipogenesis mini pathway within the tricarboxylic acid cycle. | Clinical use: hypercholesterolemia (bempedoic acid).<br><i>In vitro</i> : EC <sub>50</sub> : 5-20μM for WT and variants of SARS-CoV-2.<br><i>In vivo</i> : IP SB 204990 ↓ viral load, virus titer, and viral antigen expression in hamsters <sup>177</sup> .                     |
| <b>DGAT</b>              | DGAT inhibitors              | Xanthohumol                                  | Inhibits DGAT-mediated lipid droplet formation.                                                                                                        | <i>In vitro</i> : EC <sub>50</sub> : 4.7μM (Caco-2 cells).<br><i>In vivo</i> : oral xanthohumol significantly reduces the viral loads, viral antigen expression, pro-inflammatory cytokines, and tissue pathology in Syrian hamsters <sup>178</sup> .                            |
| <b>Eicosanoids</b>       | PTGDR inhibitors             | Asapiprant                                   | Inhibits PTGDR-mediated eicosanoid signalling.                                                                                                         | <i>In vivo</i> : ↑ survival and ↓ lung virus titers and tissue damage in mice infected with mouse-adapted SARS-CoV-2 <sup>179</sup> .                                                                                                                                            |
| <b>PIK3C3</b>            | PIK3C3 inhibitors            | Autophinib<br>ALLN<br>PIK-III<br>Compound-19 | Increases cholesterol biosynthesis.                                                                                                                    | <i>In vitro</i> : ↓ viral load (A549-ACE2 cells) <sup>161</sup> .                                                                                                                                                                                                                |
| <b>SREBPs</b>            | SREBP inhibitors             | AM580<br>Tamibarotene                        | Inhibits SREBP-mediated lipogenesis essential for viral replication.                                                                                   | Clinical uses: acute promyelocytic leukemia<br><i>In vitro</i> : EC <sub>50</sub> : 7.6μM (AM580 in VeroE6 cells) <sup>54</sup> .<br><i>In vivo</i> : inhaled tamibarotene ↓ clinical signs, lung viral load, virus titer, and tissue damage in Syrian hamsters <sup>180</sup> . |

---

**Others**


---

|                  |                      |            |                                             |                                                                                                                       |
|------------------|----------------------|------------|---------------------------------------------|-----------------------------------------------------------------------------------------------------------------------|
| <b>Apoptosis</b> | Caspase 6 inhibitors | z-VEID-fmk | Inhibits coronavirus nucleocapsid cleavage, | <i>In vitro</i> : EC <sub>50</sub> : 3.3μM (Calu-3 cells).<br><i>In vivo</i> : ↓ lung viral load, virus titers, viral |
|------------------|----------------------|------------|---------------------------------------------|-----------------------------------------------------------------------------------------------------------------------|

|                                 |                        |                                              |                                                                                                                |                                                                                                                                                                                                                                                                                                                                                                                                                                    |
|---------------------------------|------------------------|----------------------------------------------|----------------------------------------------------------------------------------------------------------------|------------------------------------------------------------------------------------------------------------------------------------------------------------------------------------------------------------------------------------------------------------------------------------------------------------------------------------------------------------------------------------------------------------------------------------|
|                                 |                        |                                              | reduces IFN antagonism, and restricts virus replication.                                                       | antigens, and tissue damage in Syrian hamsters <sup>181</sup> .                                                                                                                                                                                                                                                                                                                                                                    |
| <b>Cyclophilins</b>             | Cyclophilin inhibitors | Alisporivir<br>Cyclosporine A                | Interaction of cyclophilins with CoV nsp1 and the calcineurin-NFAT pathway.                                    | Clinical uses: HCV (alisporivir) and immunosuppression (cyclosporin A).<br><i>In vitro</i> : EC <sub>50</sub> : 0.46 μM (alisporivir in VeroE6 cells) <sup>182</sup> .                                                                                                                                                                                                                                                             |
| <b>Virus-induced senescence</b> | Senolytics             | Dasatinib-quercetin<br>Fisetin<br>Navitoclax | Selective elimination of virus-induced senescent cells.                                                        | <i>In vitro</i> : selectively eliminates virus-induced senescent cells.<br><i>In vivo</i> : ↑ survival and ↓ lung tissue damage in Roborovski dwarf hamsters and K18-hACE2 mice <sup>183</sup> .                                                                                                                                                                                                                                   |
| <b>Uncertain</b>                | Avermectins            | Ivermectin                                   | Likely acts on multiple targets.                                                                               | Clinical uses: nematode and ectoparasite infection/infestation.<br><i>In vitro</i> : EC <sub>50</sub> : <10μM (VeroE6 cells) <sup>184,185</sup> .                                                                                                                                                                                                                                                                                  |
|                                 | Thiazolide             | Nitazoxanide                                 | Inhibition of proinflammatory cytokines and host enzymes to ↓ post-translational processing of viral proteins. | Clinical uses: <i>Cryptosporidium parvum</i> and <i>Giardia duodenalis</i> infections.<br><i>In vitro</i> : EC <sub>50</sub> : 0.58-3.19 μM (VeroE6 and Caco-2 cells) <sup>57</sup> .<br><i>In vivo</i> : no significant viral load reduction in Syrian hamsters with suboptimal tissue concentrations of tizoxanide (the active metabolite of nitazoxanide) that were below the <i>in vitro</i> EC <sub>50</sub> <sup>186</sup> . |

**Abbreviations:** ACA, N-(p-aminocinnamoyl)anthranilic acid; ARDS, acute respiratory distress syndrome; ASTEX, activated specialized tissue effector extracellular vesicles; ATP, adenosine triphosphate; BET, bromodomain and extraterminal; BRD2 and BRD4, bromodomain-containing proteins 2 and 4; BTK, Bruton's tyrosine kinase; CAR, chimeric antigen receptor; CD147, cluster of differentiation 147; CMK, decanoyl-RVKR-chloromethylketone; COPD, chronic obstructive pulmonary disease; CoV, coronavirus; CPE, cytopathic effects; DGAT, diacylglycerol acyltransferase; eEF1A, elongation factor-1A; eIF4A, eukaryotic initiation factor-4A; ER, endoplasmic reticulum; evACE2, extracellular vesicles expressing ACE2; GM-CSF, granulocyte-macrophage colony-stimulating factor; GVHD, graft-versus-host disease; hACE2, human angiotensin-converting enzyme 2; HAE, primary human airway epithelia; HBV, hepatitis B virus; HCV, hepatitis C virus; HDAC2, histone deacetylase 2; HDV, hepatitis D virus; HMGB1, high mobility group box 1; HSPGs, heparan sulfate proteoglycans; IFN, interferon; IFN, interferon; IL, interleukin; IP, intraperitoneal; JAK, Janus kinase; LMWH, low molecular weight heparin; mAb, monoclonal antibody; MEK/ERK, Ras/Raf/Mitogen-activated protein kinase/ERK kinase/extracellular-signal-regulated kinase; MIS-C, multisystem inflammatory syndrome; MMP, extracellular matrix metalloproteinase; MMT-MMP, membrane-type matrix metalloproteinase; NF-κB, nuclear factor kappa B (NF-κB); NLRP3, nucleotide-binding oligomerization domain-, leucine-rich repeat-, and pyrin domain-containing protein 3; PI(3,5)P2, phosphatidylinositol-3,5-bisphosphate; PI3K/AKT/mTOR, phosphoinositide3-kinase/protein kinase B/mammalian target of rapamycin; PIK3C3, phosphatidylinositol 3-kinase catalytic

subunit type 3; PIK-fyve, phosphatidylinositol 3-phosphate 5-kinase; PTGDR, prostaglandin D<sub>2</sub> receptor; S1P, sphingosine-1-phosphate; sc, subcutaneous; SERMs; selective estrogen receptor modulators; SREBPs, sterol regulatory-element binding proteins; SSRI, selective serotonin reuptake inhibitor; TMPRSS2, transmembrane protease, serine 2; TOP1, topoisomerase 1; TPC2, two-pore channel 2; TRPMLs, transient receptor potential mucolipin channels; UPR, unfolded protein response.

## References

1. Chen, Y., et al., Broadly neutralizing antibodies to SARS-CoV-2 and other human coronaviruses. *Nat Rev Immunol*, 2022.
2. Xiang, R., et al., Neutralizing monoclonal antibodies against highly pathogenic coronaviruses. *Curr Opin Virol*, 2022. 53: p. 101199.
3. Chan, J.F., et al., Simulation of the Clinical and Pathological Manifestations of Coronavirus Disease 2019 (COVID-19) in a Golden Syrian Hamster Model: Implications for Disease Pathogenesis and Transmissibility. *Clin Infect Dis*, 2020. 71(9): p. 2428-2446.
4. Takamatsu, Y., et al., Highly Neutralizing COVID-19 Convalescent Plasmas Potently Block SARS-CoV-2 Replication and Pneumonia in Syrian Hamsters. *J Virol*, 2022. 96(4): p. e0155121.
5. McMahan, K., et al., Correlates of protection against SARS-CoV-2 in rhesus macaques. *Nature*, 2021. 590(7847): p. 630-634.
6. Valero, J., et al., A serum-stable RNA aptamer specific for SARS-CoV-2 neutralizes viral entry. *Proc Natl Acad Sci U S A*, 2021. 118(50).
7. Yang, G., et al., Identification of SARS-CoV-2-against aptamer with high neutralization activity by blocking the RBD domain of spike protein 1. *Signal Transduct Target Ther*, 2021. 6(1): p. 227.
8. Cao, L., et al., De novo design of picomolar SARS-CoV-2 miniprotein inhibitors. *Science*, 2020. 370(6515):426-431.
9. Ohashi, H., et al., Potential anti-COVID-19 agents, cepharanthine and nelfinavir, and their usage for combination treatment. *iScience*, 2021. 24(4): p. 102367.
10. Fan, H.H., et al., Repurposing of clinically approved drugs for treatment of coronavirus disease 2019 in a 2019-novel coronavirus-related coronavirus model. *Chin Med J (Engl)*, 2020. 133(9): p. 1051-1056.
11. Wang, X., et al., The anti-influenza virus drug, arbidol is an efficient inhibitor of SARS-CoV-2 in vitro. *Cell Discov*, 2020. 6: p. 28.
12. Shuster, A., et al., Clinical Antiviral Drug Arbidol Inhibits Infection by SARS-CoV-2 and Variants through Direct Binding to the Spike Protein. *ACS Chem Biol*, 2021. 16(12): p. 2845-2851.
13. Shytaj, I.L., et al., The FDA-Approved Drug Cobicistat Synergizes with Remdesivir To Inhibit SARS-CoV-2 Replication In Vitro and Decreases Viral Titers and Disease Progression in Syrian Hamsters. *mBio*, 2022. 13(2): p. e0370521.
14. Xia, S., et al., Peptide-based pan-CoV fusion inhibitors maintain high potency against SARS-CoV-2 Omicron variant. *Cell Res*, 2022. 32(4): p. 404-406.



15. Zhao, H., et al., A broad-spectrum virus- and host-targeting peptide against respiratory viruses including influenza virus and SARS-CoV-2. *Nat Commun*, 2020. 11(1): p. 4252.
16. Zhao, H., et al., Cross-linking peptide and repurposed drugs inhibit both entry pathways of SARS-CoV-2. *Nat Commun*, 2021. 12(1): p. 1517.
17. de Vries, R.D., et al., Intranasal fusion inhibitory lipopeptide prevents direct-contact SARS-CoV-2 transmission in ferrets. *Science*, 2021. 371(6536): p. 1379-1382.
18. Xia, S., et al., Inhibition of SARS-CoV-2 (previously 2019-nCoV) infection by a highly potent pan-coronavirus fusion inhibitor targeting its spike protein that harbors a high capacity to mediate membrane fusion. *Cell Res*, 2020. 30(4): p. 343-355.
19. Rothenberger, S., et al., The trispecific DARPin ensovibep inhibits diverse SARS-CoV-2 variants. *Nat Biotechnol*, 2022.
20. Jeon, S., et al., Identification of Antiviral Drug Candidates against SARS-CoV-2 from FDA-Approved Drugs. *Antimicrob Agents Chemother*, 2020. 64(7).
21. Braga, L., et al., Drugs that inhibit TMEM16 proteins block SARS-CoV-2 spike-induced syncytia. *Nature*, 2021. 594(7861): p. 88-93.
22. Technology, P. Daewoong finds niclosamide effective against Covid-19 in animal tests. 2020; Available from: <https://www.pharmaceutical-technology.com/news/daewoong-niclosamide-animal-data/>.
23. Chan, J.F., et al., A molecularly engineered, broad-spectrum anti-coronavirus lectin inhibits SARS-CoV-2 and MERS-CoV infection in vivo. *Cell Rep Med*, 2022. 3(10): p. 100774.
24. Liu, Y.M., et al., A Carbohydrate-Binding Protein from the Edible Lablab Beans Effectively Blocks the Infections of Influenza Viruses and SARS-CoV-2. *Cell Rep*, 2020. 32(6): p. 108016.
25. Cai, Y., et al., Griffithsin with A Broad-Spectrum Antiviral Activity by Binding Glycans in Viral Glycoprotein Exhibits Strong Synergistic Effect in Combination with A Pan-Coronavirus Fusion Inhibitor Targeting SARS-CoV-2 Spike S2 Subunit. *Virol Sin*, 2020. 35(6): p. 857-860.
26. Ahan, R.E., et al., A Highly Potent SARS-CoV-2 Blocking Lectin Protein. *ACS Infect Dis*, 2022. 8(7): p. 1253-1264.
27. Yuan, S., et al., Targeting papain-like protease for broad-spectrum coronavirus inhibition. *Protein Cell*, 2022. 13(12): p. 940-953.
28. Zhao, Y., et al., High-throughput screening identifies established drugs as SARS-CoV-2 PLpro inhibitors. *Protein Cell*, 2021. 12(11): p. 877-888.

29. Shin, D., et al., Papain-like protease regulates SARS-CoV-2 viral spread and innate immunity. *Nature*, 2020. 587(7835): p. 657-662.
30. Klemm, T., et al., Mechanism and inhibition of the papain-like protease, PLpro, of SARS-CoV-2. *EMBO J*, 2020. 39(18): p. e106275.
31. Swaim, C.D., et al., 6-Thioguanine blocks SARS-CoV-2 replication by inhibition of PLpro. *iScience*, 2021. 24(10): p. 103213.
32. Owen, D.R., et al., An oral SARS-CoV-2 M(pro) inhibitor clinical candidate for the treatment of COVID-19. *Science*, 2021. 374(6575): p. 1586-1593.
33. Zhang, L., et al., Crystal structure of SARS-CoV-2 main protease provides a basis for design of improved alpha-ketoamide inhibitors. *Science*, 2020. 368(6489): p. 409-412.
34. Vandyck, K., et al., ALG-097111, a potent and selective SARS-CoV-2 3-chymotrypsin-like cysteine protease inhibitor exhibits in vivo efficacy in a Syrian Hamster model. *Biochem Biophys Res Commun*, 2021. 555: p. 134-139.
35. CISION PR Newswire. Ascleptis Announces 3CLpro Inhibitor ASC11 Demonstrated Potential to be Effective Treatment for COVID-19. 2022; Available from: <https://www.prnewswire.com/news-releases/ascletis-announces-3clpro-inhibitor-asc11-demonstrated-potential-to-be-effective-treatment-for-covid-19-301527722.html>.
36. Balakrishnan, A., et al. Molecular Basis for Antiviral Action of EDP - 235: A Potent and Selective SARS - CoV - 2 3CLpro Inhibitor for the Treatment of Covid 19. 2022; Available from: <https://www.ncbi.nlm.nih.gov/pmc/articles/PMC9347656/>.
37. Kuroda, T., et al. Efficacy comparison of 3CL protease inhibitors ensitrelvir and nirmatrelvir against SARS-CoV-2 in vitro and in vivo. *J Antimicrob Chemother*, 2023. 78(4):946-952.
38. Sasaki, M., et al. S-217622, a SARS-CoV-2 main protease inhibitor, decreases viral load and ameliorates COVID-19 severity in hamsters. *Sci Transl Med*, 2023. 15(679):eabq4064.
39. Unoh, Y., et al., Discovery of S-217622, a Noncovalent Oral SARS-CoV-2 3CL Protease Inhibitor Clinical Candidate for Treating COVID-19. *J Med Chem*, 2022. 65(9): p. 6499-6512.
40. Vuong, W., et al., Feline coronavirus drug inhibits the main protease of SARS-CoV-2 and blocks virus replication. *Nat Commun*, 2020. 11(1): p. 4282.
41. Global Health Drug Discovery Institute, GHDDI Announces Advancement of a Novel Oral Antiviral Candidate for COVID-19 in Its Investigational New Drug Studies. 2022; Available from: <http://121.42.169.1/en/node/409>.

42. Dai, W., et al., Structure-based design of antiviral drug candidates targeting the SARS-CoV-2 main protease. *Science*, 2020. 368(6497): p. 1331-1335.
43. Chen, X., et al., Inhibition mechanism and antiviral activity of an  $\alpha$ -ketoamide based SARS-CoV-2 main protease inhibitor. *bioRxiv*, 2023. <https://doi.org/10.1101/2023.03.09.531862>
44. Qiao, J., et al., SARS-CoV-2 M(pro) inhibitors with antiviral activity in a transgenic mouse model. *Science*, 2021. 371(6536): p. 1374-1378.
45. Kearney, B.P., et al. PBI-0451 an orally administered 3CL protease inhibitor of SARS-CoV\_2 for COVID-19. *Topics in Antiviral Medicine*, 2022. 30(1 Suppl):179-180. Available from: <https://pesquisa.bvsalud.org/global-literature-on-novel-coronavirus-2019-ncov/resource/pt/covidwho-1880428?lang=en>
46. de Vries, M., et al., A comparative analysis of SARS-CoV-2 antivirals characterizes 3CL(pro) inhibitor PF-00835231 as a potential new treatment for COVID-19. *J Virol*, 2021. 95(7): e01819-20.
47. Jin, Z., et al., Structure of M(pro) from SARS-CoV-2 and discovery of its inhibitors. *Nature*, 2020. 582(7811): p. 289-293.
48. Jiang, X., et al., Structure-based development and preclinical evaluation of the SARS-CoV-2 3C-like protease inhibitor simnotrelvir. *Nat Commun*, 2023. 14(1): 6463.
49. Quan, B.X., et al., An orally available M(pro) inhibitor is effective against wild-type SARS-CoV-2 and variants including Omicron. *Nat Microbiol*, 2022. 7(5): p. 716-725.
50. Baker, J.D., et al., A drug repurposing screen identifies hepatitis C antivirals as inhibitors of the SARS-CoV2 main protease. *PLoS One*, 2021. 16(2): p. e0245962.
51. Mahmoud, A., et al., Telaprevir is a potential drug for repurposing against SARS-CoV-2: computational and in vitro studies. *Heliyon*, 2021. 7(9): p. e07962.
52. Fintelman-Rodrigues, N., et al., Atazanavir, Alone or in Combination with Ritonavir, Inhibits SARS-CoV-2 Replication and Proinflammatory Cytokine Production. *Antimicrob Agents Chemother*, 2020. 64(10).
53. Chaves, O.A., et al., Atazanavir Is a Competitive Inhibitor of SARS-CoV-2 M(pro), Impairing Variants Replication In Vitro and In Vivo. *Pharmaceuticals (Basel)*, 2021. 15(1).
54. Yuan, S., et al., Broad-Spectrum Host-Based Antivirals Targeting the Interferon and Lipogenesis Pathways as Potential Treatment Options for the Pandemic Coronavirus Disease 2019 (COVID-19). *Viruses*, 2020. 12(6).
55. Park, S.J., et al., Antiviral Efficacies of FDA-Approved Drugs against SARS-CoV-2 Infection in Ferrets. *mBio*, 2020. 11(3).

56. Jang, W.D., et al., Drugs repurposed for COVID-19 by virtual screening of 6,218 drugs and cell-based assay. *Proc Natl Acad Sci U S A*, 2021. 118(30).
57. Wang, M., et al., Remdesivir and chloroquine effectively inhibit the recently emerged novel coronavirus (2019-nCoV) in vitro. *Cell Res*, 2020. 30(3): p. 269-271.
58. Williamson, B.N., et al., Clinical benefit of remdesivir in rhesus macaques infected with SARS-CoV-2. *Nature*, 2020. 585(7824): p. 273-276.
59. Cao, L., et al., The adenosine analog prodrug ATV006 is orally bioavailable and has preclinical efficacy against parental SARS-CoV-2 and variants. *Sci Transl Med*, 2022. 14(661): p. eabm7621.
60. Cox, R.M., et al., Oral prodrug of remdesivir parent GS-441524 is efficacious against SARS-CoV-2 in ferrets. *Nat Commun*, 2021. 12(1): p. 6415.
61. Lo, M.K., et al., Broad-Spectrum In Vitro Antiviral Activity of ODBG-P-RVn: An Orally-Available, Lipid-Modified Monophosphate Prodrug of Remdesivir Parent Nucleoside (GS-441524). *Microbiol Spectr*, 2021. 9(3): p. e0153721.
62. Schooley, R.T., et al., Rethinking Remdesivir: Synthesis, Antiviral Activity, and Pharmacokinetics of Oral Lipid Prodrugs. *Antimicrob Agents Chemother*, 2021. 65(10): p. e0115521.
63. Xie, Y., et al., Design and development of an oral remdesivir derivative VV116 against SARS-CoV-2. *Cell Res*, 2021. 31(11): p. 1212-1214.
64. Qian, H.J., et al., Safety, tolerability, and pharmacokinetics of VV116, an oral nucleoside analog against SARS-CoV-2, in Chinese healthy subjects. *Acta Pharmacol Sin*, 2022.
65. Taylor, R., et al., Activity of Galidesivir in a Hamster Model of SARS-CoV-2. *Viruses*, 2021. 14(1).
66. Zhou, S., et al., beta-d-N4-hydroxycytidine Inhibits SARS-CoV-2 Through Lethal Mutagenesis But Is Also Mutagenic To Mammalian Cells. *J Infect Dis*, 2021. 224(3): p. 415-419.
67. Toots, M., et al., Characterization of orally efficacious influenza drug with high resistance barrier in ferrets and human airway epithelia. *Sci Transl Med*, 2019. 11(515).
68. Rosenke, K., et al., Orally delivered MK-4482 inhibits SARS-CoV-2 replication in the Syrian hamster model. *Nat Commun*, 2021. 12(1): p. 2295.
69. Wahl, A., et al., SARS-CoV-2 infection is effectively treated and prevented by EIDD-2801. *Nature*, 2021. 591(7850): p. 451-457.

70. Cox, R.M., J.D. Wolf, and R.K. Plemper, Therapeutically administered ribonucleoside analogue MK-4482/EIDD-2801 blocks SARS-CoV-2 transmission in ferrets. *Nat Microbiol*, 2021. 6(1): p. 11-18.
71. Shahab, S. and M. Sheikhi, Triazavirin - Potential Inhibitor for 2019-nCoV Coronavirus M Protease: A DFT Study. *Curr Mol Med*, 2021. 21(8): p. 645-654.
72. Pharmaceuticals, A. COVID-19 AND BEMNIFOSBUVIR: In Vitro Results Against COVID-19 Variants. 2020; Available from: <https://ateapharma.com/covid-19/bemnifosbuvir/>.
73. Sacramento, C.Q., et al., In vitro antiviral activity of the anti-HCV drugs daclatasvir and sofosbuvir against SARS-CoV-2, the aetiological agent of COVID-19. *J Antimicrob Chemother*, 2021. 76(7): p. 1874-1885.
74. Zhang, J.L., et al., Azvudine is a thymus-homing anti-SARS-CoV-2 drug effective in treating COVID-19 patients. *Signal Transduct Target Ther*, 2021. 6(1): p. 414.
75. Bai, X., et al., Identifying Small-Molecule Inhibitors of SARS-CoV-2 RNA-Dependent RNA Polymerase by Establishing a Fluorometric Assay. *Front Immunol*, 2022. 13: p. 844749.
76. Elli, S., et al., Enisamium Inhibits SARS-CoV-2 RNA Synthesis. *Biomedicines*, 2021. 9(9).
77. Driouich, J.S., et al., Favipiravir antiviral efficacy against SARS-CoV-2 in a hamster model. *Nat Commun*, 2021. 12(1): p. 1735.
78. Idris, A., et al., A SARS-CoV-2 targeted siRNA-nanoparticle therapy for COVID-19. *Mol Ther*, 2021. 29(7): p. 2219-2226.
79. Chang, Y.C., et al., A siRNA targets and inhibits a broad range of SARS-CoV-2 infections including Delta variant. *EMBO Mol Med*, 2022. 14(4): p. e15298.
80. Khaitov, M., et al., Silencing of SARS-CoV-2 with modified siRNA-peptide dendrimer formulation. *Allergy*, 2021. 76(9): p. 2840-2854.
81. Yuan, S., et al., Metallodrug ranitidine bismuth citrate suppresses SARS-CoV-2 replication and relieves virus-associated pneumonia in Syrian hamsters. *Nat Microbiol*, 2020. 5(11): p. 1439-1448.
82. Zeng, J., et al., Identifying SARS-CoV-2 antiviral compounds by screening for small molecule inhibitors of nsp13 helicase. *Biochem J*, 2021. 478(13): p. 2405-2423.
83. Wang, X., et al., Combination of antiviral drugs inhibits SARS-CoV-2 polymerase and exonuclease and demonstrates COVID-19 therapeutic potential in viral cell culture. *Commun Biol*, 2022. 5(1): p. 154.
84. Kim, Y., et al., Tipiracil binds to uridine site and inhibits Nsp15 endoribonuclease NendoU from SARS-CoV-2. *Commun Biol*, 2021. 4(1): p. 193.

85. El Hassab, M.A., et al., In silico identification of novel SARS-COV-2 2'-O-methyltransferase (nsp16) inhibitors: structure-based virtual screening, molecular dynamics simulation and MM-PBSA approaches. *J Enzyme Inhib Med Chem*, 2021. 36(1): p. 727-736.
86. Hamre, J.R., 3rd and M.S. Jafri, Optimizing peptide inhibitors of SARS-Cov-2 nsp10/nsp16 methyltransferase predicted through molecular simulation and machine learning. *Inform Med Unlocked*, 2022. 29: p. 100886.
87. Yuan, S., et al., Clofazimine broadly inhibits coronaviruses including SARS-CoV-2. *Nature*, 2021. 593(7859): p. 418-423.
88. Lo, H.S., et al., Simeprevir Potently Suppresses SARS-CoV-2 Replication and Synergizes with Remdesivir. *ACS Cent Sci*, 2021. 7(5): p. 792-802.
89. Bafna, K., et al., Hepatitis C virus drugs that inhibit SARS-CoV-2 papain-like protease synergize with remdesivir to suppress viral replication in cell culture. *Cell Rep*, 2021. 35(7): p. 109133.
90. Jin, Z., et al., Structural basis for the inhibition of SARS-CoV-2 main protease by antineoplastic drug carmofur. *Nat Struct Mol Biol*, 2020. 27(6): p. 529-532.
91. Ma, C., et al., Ebselen, Disulfiram, Carmofur, PX-12, Tideglusib, and Shikonin Are Nonspecific Promiscuous SARS-CoV-2 Main Protease Inhibitors. *ACS Pharmacol Transl Sci*, 2020. 3(6): p. 1265-1277.
92. Chen, T., et al., Synergistic Inhibition of SARS-CoV-2 Replication Using Disulfiram/Ebselen and Remdesivir. *ACS Pharmacol Transl Sci*, 2021. 4(2): p. 898-907.
93. Fink, K., et al., Amantadine Inhibits SARS-CoV-2 In Vitro. *Viruses*, 2021. 13(4).
94. Toft-Bertelsen, T.L., et al., Amantadine has potential for the treatment of COVID-19 because it inhibits known and novel ion channels encoded by SARS-CoV-2. *Commun Biol*, 2021. 4(1): p. 1347.
95. Breitinger, U., et al., Inhibition of SARS CoV Envelope Protein by Flavonoids and Classical Viroporin Inhibitors. *Front Microbiol*, 2021. 12: p. 692423.
96. Ambike, S., et al., Targeting genomic SARS-CoV-2 RNA with siRNAs allows efficient inhibition of viral replication and spread. *Nucleic Acids Res*, 2022. 50(1): p. 333-349.
97. Wu, R. and K.Q. Luo, Developing effective siRNAs to reduce the expression of key viral genes of COVID-19. *Int J Biol Sci*, 2021. 17(6): p. 1521-1529.
98. Schlesinger, N., B.L. Firestein, and L. Brunetti, Colchicine in COVID-19: an Old Drug, New Use. *Curr Pharmacol Rep*, 2020. 6(4): p. 137-145.
99. GlobeNewswire. VERU-111 Suppresses Key Cytokines Responsible for Severe Acute Respiratory Distress Syndrome in COVID-19. 2020; Available from:

<https://www.globenewswire.com/news-release/2020/08/04/2072487/11676/en/VERU-111-Suppresses-Key-Cytokines-Responsible-for-Severe-Acute-Respiratory-Distress-Syndrome-in-COVID-19.html>

100. Ye, Z.W., et al., Beneficial effect of combinational methylprednisolone and remdesivir in hamster model of SARS-CoV-2 infection. *Emerg Microbes Infect*, 2021. 10(1): p. 291-304.
101. Matsuyama, S., et al., The Inhaled Steroid Ciclesonide Blocks SARS-CoV-2 RNA Replication by Targeting the Viral Replication-Transcription Complex in Cultured Cells. *J Virol*, 2020. 95(1).
102. Ye, F., et al., Novaferon Effectively Inhibits Ancestral SARS-CoV-2 and Omicron Variant in Vitro, 2022. *China CDC Wkly*, 2022. 4(23): p. 509-512.
103. Bessiere, P., et al., Intranasal type I interferon treatment is beneficial only when administered before clinical signs onset in the SARS-CoV-2 hamster model. *PLoS Pathog*, 2021. 17(8): p. e1009427.
104. Heuberger, J., et al., Epithelial response to IFN-gamma promotes SARS-CoV-2 infection. *EMBO Mol Med*, 2021. 13(4): p. e13191.
105. Karki, R., et al., Synergism of TNF-alpha and IFN-gamma Triggers Inflammatory Cell Death, Tissue Damage, and Mortality in SARS-CoV-2 Infection and Cytokine Shock Syndromes. *Cell*, 2021. 184(1): p. 149-168 e17.
106. Dinno, K.H., 3rd, et al., A mouse-adapted model of SARS-CoV-2 to test COVID-19 countermeasures. *Nature*, 2020. 586(7830): p. 560-566.
107. Chong, Z., et al., Nasally delivered interferon-lambda protects mice against infection by SARS-CoV-2 variants including Omicron. *Cell Rep*, 2022. 39(6): p. 110799.
108. Souza-Moreira, L., et al., Poly(I:C) enhances mesenchymal stem cell control of myeloid cells from COVID-19 patients. *iScience*, 2022. 25(5): p. 104188.
109. Tamir, H., et al., Induction of Innate Immune Response by TLR3 Agonist Protects Mice against SARS-CoV-2 Infection. *Viruses*, 2022. 14(2).
110. Acharya, A., et al., PI3K-alpha/mTOR/BRD4 inhibitor alone or in combination with other anti-virals blocks replication of SARS-CoV-2 and its variants of concern including Delta and Omicron. *Clin Transl Med*, 2022. 12(4): p. e806.
111. Gilham, D., et al., Bromodomain and Extraterminal Protein Inhibitor, Apabetalone (RVX-208), Reduces ACE2 Expression and Attenuates SARS-Cov-2 Infection In Vitro. *Biomedicines*, 2021. 9(4).
112. Stebbing, J., et al., COVID-19: combining antiviral and anti-inflammatory treatments. *Lancet Infect Dis*, 2020. 20(4): p. 400-402.

113. Hoang, T.N., et al., Baricitinib treatment resolves lower-airway macrophage inflammation and neutrophil recruitment in SARS-CoV-2-infected rhesus macaques. *Cell*, 2021. 184(2): p. 460-475 e21.
114. Rosen, D.A., et al., Modulation of the sigma-1 receptor-IRE1 pathway is beneficial in preclinical models of inflammation and sepsis. *Sci Transl Med*, 2019. 11(478).
115. Hashimoto, Y., T. Suzuki, and K. Hashimoto, Mechanisms of action of fluvoxamine for COVID-19: a historical review. *Mol Psychiatry*, 2022. 27(4): p. 1898-1907.
116. Gordon, D.E., et al., A SARS-CoV-2 protein interaction map reveals targets for drug repurposing. *Nature*, 2020. 583(7816): p. 459-468.
117. Mukherjee, R., et al., Famotidine inhibits toll-like receptor 3-mediated inflammatory signaling in SARS-CoV-2 infection. *J Biol Chem*, 2021. 297(2): p. 100925.
118. Mastellos, D.C., et al., Complement C3 vs C5 inhibition in severe COVID-19: Early clinical findings reveal differential biological efficacy. *Clin Immunol*, 2020. 220: p. 108598.
119. Declercq, J., et al., Zilucoplan in patients with acute hypoxic respiratory failure due to COVID-19 (ZILU-COV): A structured summary of a study protocol for a randomised controlled trial. *Trials*, 2020. 21(1): p. 934.
120. Vlaar, A.P.J., et al., Anti-C5a antibody IFX-1 (vilobelimab) treatment versus best supportive care for patients with severe COVID-19 (PANAMO): an exploratory, open-label, phase 2 randomised controlled trial. *Lancet Rheumatol*, 2020. 2(12): p. e764-e773.
121. McEneny-King, A.C., et al., Pharmacokinetic and Pharmacodynamic Evaluation of Ravulizumab in Adults with Severe Coronavirus Disease 2019. *Infect Dis Ther*, 2021. 10(2): p. 1045-1054.
122. Ho, J.S.Y., et al., TOP1 inhibition therapy protects against SARS-CoV-2-induced lethal inflammation. *Cell*, 2021. 184(10): p. 2618-2632 e17.
123. van de Sand, L., et al., Glycyrrhizin Effectively Inhibits SARS-CoV-2 Replication by Inhibiting the Viral Main Protease. *Viruses*, 2021. 13(4).
124. Gowda, P., et al., Glycyrrhizin prevents SARS-CoV-2 S1 and Orf3a induced high mobility group box 1 (HMGB1) release and inhibits viral replication. *Cytokine*, 2021. 142: p. 155496.
125. Takahashi, Y., et al., Histone deacetylase inhibitors suppress ACE2 and ABO simultaneously, suggesting a preventive potential against COVID-19. *Sci Rep*, 2021. 11(1): p. 3379.
126. Smith, C.D., et al., Recent Progress in the Development of Opaganib for the Treatment of Covid-19. *Drug Des Devel Ther*, 2022. 16: p. 2199-2211.



127. Wysocki, J., et al., A Novel Soluble ACE2 Variant with Prolonged Duration of Action Neutralizes SARS-CoV-2 Infection in Human Kidney Organoids. *J Am Soc Nephrol*, 2021.
128. Hassler, L., et al., A Novel Soluble ACE2 Protein Provides Lung and Kidney Protection in Mice Susceptible to Lethal SARS-CoV-2 Infection. *J Am Soc Nephrol*, 2022. 33(7): p. 1293-1307.
129. Ikemura, N., et al., An engineered ACE2 decoy neutralizes the SARS-CoV-2 Omicron variant and confers protection against infection in vivo. *Sci Transl Med*, 2022. 14(650): p. eabn7737.
130. Chen, Y., et al., Engineered ACE2-Fc counters murine lethal SARS-CoV-2 infection through direct neutralization and Fc-effector activities. *Sci Adv*, 2022. 8(28): p. eabn4188.
131. Davies, S.P., et al., The Hyperlipidaemic Drug Fenofibrate Significantly Reduces Infection by SARS-CoV-2 in Cell Culture Models. *Front Pharmacol*, 2021. 12: p. 660490.
132. Zhang, Q., et al., Heparan sulfate assists SARS-CoV-2 in cell entry and can be targeted by approved drugs in vitro. *Cell Discov*, 2020. 6(1): p. 80.
133. Bermejo-Jambrina, M., et al., Infection and transmission of SARS-CoV-2 depend on heparan sulfate proteoglycans. *EMBO J*, 2021. 40(20): p. e106765.
134. Bertini, S., et al., Pentosan Polysulfate Inhibits Attachment and Infection by SARS-CoV-2 In Vitro: Insights into Structural Requirements for Binding. *Thromb Haemost*, 2022. 122(6): p. 984-997.
135. Zhang, F., et al., Potential Anti-SARS-CoV-2 Activity of Pentosan Polysulfate and Mucopolysaccharide Polysulfate. *Pharmaceuticals (Basel)*, 2022. 15(2).
136. Hu, Y., et al., Brilacidin, a COVID-19 drug candidate, demonstrates broad-spectrum antiviral activity against human coronaviruses OC43, 229E, and NL63 through targeting both the virus and the host cell. *J Med Virol*, 2022. 94(5): p. 2188-2200.
137. Hu, Y., et al., The in vitro antiviral activity of lactoferrin against common human coronaviruses and SARS-CoV-2 is mediated by targeting the heparan sulfate co-receptor. *Emerg Microbes Infect*, 2021. 10(1): p. 317-330.
138. Wang, K., et al., CD147-spike protein is a novel route for SARS-CoV-2 infection to host cells. *Signal Transduct Target Ther*, 2020. 5(1): p. 283.
139. Hoffmann, M., et al., Camostat mesylate inhibits SARS-CoV-2 activation by TMPRSS2-related proteases and its metabolite GBPA exerts antiviral activity. *EBioMedicine*, 2021. 65: p. 103255.
140. Hoffmann, M., et al., Nafamostat Mesylate Blocks Activation of SARS-CoV-2: New Treatment Option for COVID-19. *Antimicrob Agents Chemother*, 2020. 64(6).

141. Li, K., et al., The TMPRSS2 Inhibitor Nafamostat Reduces SARS-CoV-2 Pulmonary Infection in Mouse Models of COVID-19. *mBio*, 2021. 12(4): p. e0097021.
142. Shapira, T., et al., A TMPRSS2 inhibitor acts as a pan-SARS-CoV-2 prophylactic and therapeutic. *Nature*, 2022. 605(7909):340-348.
143. Sun, Y. J., et al., Structure-based phylogeny identifies avoralstat as a TMPRSS2 inhibitor that prevents SARS-CoV-2 infection in mice. *J Clin Invest*, 2021. 131(10):e147973.
144. Maggio, R. and G.U. Corsini, Repurposing the mucolytic cough suppressant and TMPRSS2 protease inhibitor bromhexine for the prevention and management of SARS-CoV-2 infection. *Pharmacol Res*, 2020. 157: p. 104837.
145. Leach, D.A., et al., The antiandrogen enzalutamide downregulates TMPRSS2 and reduces cellular entry of SARS-CoV-2 in human lung cells. *Nat Commun*, 2021. 12(1): p. 4068.
146. Zhao, M.M., et al., Cathepsin L plays a key role in SARS-CoV-2 infection in humans and humanized mice and is a promising target for new drug development. *Signal Transduct Target Ther*, 2021. 6(1): p. 134.
147. Ou, X., et al., Characterization of spike glycoprotein of SARS-CoV-2 on virus entry and its immune cross-reactivity with SARS-CoV. *Nat Commun*, 2020. 11(1): p. 1620.
148. Wang, G., et al., Dalbavancin binds ACE2 to block its interaction with SARS-CoV-2 spike protein and is effective in inhibiting SARS-CoV-2 infection in animal models. *Cell Res*, 2021. 31(1): p. 17-24.
149. Liu, J., et al., Hydroxychloroquine, a less toxic derivative of chloroquine, is effective in inhibiting SARS-CoV-2 infection in vitro. *Cell Discov*, 2020. 6: p. 16.
150. Shang, C., et al., Inhibitors of endosomal acidification suppress SARS-CoV-2 replication and relieve viral pneumonia in hACE2 transgenic mice. *Virology*, 2021. 18(1): p. 46.
151. Rosenke, K., et al., Hydroxychloroquine prophylaxis and treatment is ineffective in macaque and hamster SARS-CoV-2 disease models. *JCI Insight*, 2020. 5(23).
152. Maisonnasse, P., et al., Hydroxychloroquine use against SARS-CoV-2 infection in non-human primates. *Nature*, 2020. 585(7826): p. 584-587.
153. Huang, L., et al., Berbamine inhibits SARS-CoV-2 infection by compromising TRPMLs-mediated endolysosomal trafficking of ACE2. *Signal Transduct Target Ther*, 2021. 6(1): p. 168.
154. Burkard, C., et al., ATP1A1-mediated Src signaling inhibits coronavirus entry into host cells. *J Virol*, 2015. 89(8): p. 4434-48.
155. Zhang, Z.R., et al., A cell-based large-scale screening of natural compounds for inhibitors of SARS-CoV-2. *Signal Transduct Target Ther*, 2020. 5(1): p. 218.

156. Jin, Y.H., et al., Broad Spectrum Antiviral Properties of Cardiotonic Steroids Used as Potential Therapeutics for Emerging Coronavirus Infections. *Pharmaceutics*, 2021. 13(11).
157. Cho, J., et al., Antiviral activity of digoxin and ouabain against SARS-CoV-2 infection and its implication for COVID-19. *Sci Rep*, 2020. 10(1): p. 16200.
158. Plaze, M., et al., Inhibition of the replication of SARS-CoV-2 in human cells by the FDA-approved drug chlorpromazine. *Int J Antimicrob Agents*, 2021. 57(3): p. 106274.
159. Riva, L., et al., Discovery of SARS-CoV-2 antiviral drugs through large-scale compound repurposing. *Nature*, 2020. 586(7827): p. 113-119.
160. Kang, Y.L., et al., Inhibition of PIKfyve kinase prevents infection by Zaire ebolavirus and SARS-CoV-2. *Proc Natl Acad Sci U S A*, 2020. 117(34): p. 20803-20813.
161. Daniloski, Z., et al., Identification of Required Host Factors for SARS-CoV-2 Infection in Human Cells. *Cell*, 2021. 184(1): p. 92-105 e16.
162. Clementi, N., et al., Naringenin is a powerful inhibitor of SARS-CoV-2 infection in vitro. *Pharmacol Res*, 2021. 163: p. 105255.
163. Chu, H., et al., Host and viral determinants for efficient SARS-CoV-2 infection of the human lung. *Nat Commun*, 2021. 12(1): p. 134.
164. Hoffmann, M., H. Kleine-Weber, and S. Pohlmann, A Multibasic Cleavage Site in the Spike Protein of SARS-CoV-2 Is Essential for Infection of Human Lung Cells. *Mol Cell*, 2020. 78(4): p. 779-784 e5.
165. Peacock, T.P., et al., The furin cleavage site in the SARS-CoV-2 spike protein is required for transmission in ferrets. *Nat Microbiol*, 2021. 6(7): p. 899-909.
166. Cheng, Y.W., et al., Furin Inhibitors Block SARS-CoV-2 Spike Protein Cleavage to Suppress Virus Production and Cytopathic Effects. *Cell Rep*, 2020. 33(2): p. 108254.
167. Chan, J.F., et al., Altered host protease determinants for SARS-CoV-2 Omicron. *Sci Adv*, 2023. 9(3):eadd3867.
168. Yuan, S., et al., Viruses harness YxxO motif to interact with host AP2M1 for replication: A vulnerable broad-spectrum antiviral target. *Sci Adv*, 2020. 6(35): p. eaba7910.
169. Bojkova, D., et al., Proteomics of SARS-CoV-2-infected host cells reveals therapy targets. *Nature*, 2020. 583(7816): p. 469-472.
170. White, K.M., et al., Plitidepsin has potent preclinical efficacy against SARS-CoV-2 by targeting the host protein eEF1A. *Science*, 2021. 371(6532): p. 926-931.
171. Zhang, X., et al., hnRNP C modulates MERS-CoV and SARS-CoV-2 replication by governing the expression of a subset of circRNAs and cognitive mRNAs. *Emerg Microbes Infect*, 2022. 11(1): p. 519-531.

172. Mullen, P.J., et al., SARS-CoV-2 infection rewire host cell metabolism and is potentially susceptible to mTORC1 inhibition. *Nat Commun*, 2021. 12(1): p. 1876.
173. Ibrahim, A.G., et al., Engineered extracellular vesicles antagonize SARS-CoV-2 infection by inhibiting mTOR signaling. *Biomater Biosyst*, 2022. 6: p. 100042.
174. Rajasekharan, S., et al., Inhibitors of Protein Glycosylation Are Active against the Coronavirus Severe Acute Respiratory Syndrome Coronavirus SARS-CoV-2. *Viruses*, 2021. 13(5).
175. Karade, S.S., et al., N-Substituted Valiolamine Derivatives as Potent Inhibitors of Endoplasmic Reticulum alpha-Glucosidases I and II with Antiviral Activity. *J Med Chem*, 2021. 64(24): p. 18010-18024.
176. Belouzard, S., et al. Clofoctol inhibits SARS-CoV-2 replication and reduces lung pathology in mice. *PLoS Pathog*. 2022. 18(5):e1010498.
177. Yuen, T.T., et al., Targeting ACLY efficiently inhibits SARS-CoV-2 replication. *Int J Biol Sci*, 2022. 18(12): p. 4714-4730.
178. Yuan, S., et al., SARS-CoV-2 exploits host DGAT and ADRP for efficient replication. *Cell Discov*, 2021. 7(1): p. 100.
179. Wong, L.R., et al., Eicosanoid signalling blockade protects middle-aged mice from severe COVID-19. *Nature*, 2022. 605(7908): p. 146-151.
180. Liao, Q., Yuan, S., Cao, J., Tang, K., Qiu, Y., Seow, H. C., Man, R. C., Shao, Z., Huang, Y., Liang, R., Chan, J. F., Yuen, K. Y., Lam, J. K., Inhaled Dry Powder Formulation of Tamibarotene, a Broad-Spectrum Antiviral against Respiratory Viruses Including SARS-CoV-2 and Influenza Virus. *Advanced Therapeutics*, 2021.
181. Chu, H., et al., Coronaviruses exploit a host cysteine-aspartic protease for replication. *Nature*, 2022. 609(7928): p. 785-792.
182. Softic, L., et al., Inhibition of SARS-CoV-2 Infection by the Cyclophilin Inhibitor Alisporivir (Debio 025). *Antimicrob Agents Chemother*, 2020. 64(7).
183. Lee, S., et al., Virus-induced senescence is a driver and therapeutic target in COVID-19. *Nature*, 2021. 599(7884): p. 283-289.
184. Delandre, O., et al., Antiviral Activity of Repurposing Ivermectin against a Panel of 30 Clinical SARS-CoV-2 Strains Belonging to 14 Variants. *Pharmaceuticals (Basel)*, 2022. 15(4).
185. Caly, L., et al., The FDA-approved drug ivermectin inhibits the replication of SARS-CoV-2 in vitro. *Antiviral Res*, 2020. 178: p. 104787.
186. Driouch, J.S., et al., Pre-clinical evaluation of antiviral activity of nitazoxanide against SARS-CoV-2. *EBioMedicine*, 2022. 82: p. 104148.
